1 **Multivariate pattern analysis of fMRI data for imaginary and real**  
2 **colours in grapheme-colour synaesthesia**

3

4

5 **Running title**

6 MVPA of grapheme-colour synaesthesia

7

8

9 **Mathieu J. Ruiz (1,2), Michel Dojat (2), Jean-Michel Hupé (1)**

10 (1) Centre de Recherche Cerveau et Cognition, Université de Toulouse Paul Sabatier & CNRS, 31300

11 Toulouse, France

12 (2) Grenoble Institut des Neurosciences, Université Grenoble Alpes, INSERM & CHU Grenoble Alpes,

13 38000 Grenoble, France

14

15

16 **Acknowledgements**

17 Research funded by *Agence Nationale de la Recherche* ANR-11-BSH2-010. Mathieu J. Ruiz was

18 supported by a Ph.D. allowance from the Université Grenoble Alpes. Grenoble MRI facility IRMaGe

19 was partly funded by the French program *Investissement d'avenir* run by the Agence Nationale de la

20 Recherche: grant *Infrastructure d'avenir en Biologie Santé* ANR-11-INBS-0006.

21 **Abstract**

22 Grapheme-colour synaesthesia is a subjective phenomenon related to perception and imagination, in  
23 which some people involuntarily but systematically associate specific, idiosyncratic colours to  
24 achromatic letters or digits. Its investigation is relevant to unravel the neural correlates of colour  
25 perception in isolation from low-level neural processing of spectral components, as well as the neural  
26 correlates of imagination by being able to reliably trigger imaginary colour experiences. However,  
27 functional MRI studies using univariate analyses failed to provide univocal evidence of the activation  
28 of the 'colour network' by synaesthesia. Applying Multivariate (multivoxel) Pattern Analysis (MVPA)  
29 on 20 synaesthetes and 20 control participants, we tested whether the neural processing of real  
30 colours (concentric rings) and synaesthetic colours (black graphemes) shared patterns of activations.  
31 Region of interest analyses in retinotopically and anatomically defined visual regions revealed neither  
32 evidence of shared circuits for real and synaesthetic colour processing, nor processing difference  
33 between synaesthetes and controls. We also found no correlation with individual experiences,  
34 characterised by measuring the strength of synaesthetic associations. The whole brain, searchlight,  
35 analysis led to similar results. We conclude that identifying the neural correlates of the synaesthetic  
36 experience of colours may still be beyond the reach of present technology and data analysis  
37 techniques.

38

39 **Keywords**

40 synesthesia; mental imagery; color perception; human vision

## 41 Introduction

42 Synaesthesia is a subjective experience shared by only a fraction of the population (Simner et al.,  
43 2006; Chun & Hupé, 2013; Simner & Carmichael, 2015; Rouw & Scholte, 2016; Watson et al., 2017),  
44 offering, in principle, an opportunity to study the neural bases of subjective experience, drawing on  
45 individual differences just like in neuropsychology, but involving healthy people. Moreover, colour,  
46 the typical prototype of a qualia (what it feels like to perceive something) is the most often cited (or  
47 at least studied: Ward, 2013) content of the synaesthetic experience. However, the very subjective  
48 nature of the synaesthetic experience represents a major obstacle when trying to set an objective  
49 and operational definition, as required in an experimental protocol. Not only subjective descriptions  
50 may vary a lot between subjects (Flournoy, 1893), but also within subjects when asked to complete  
51 the same questionnaire again (Edquist, Rich, Brinkman, & Mattingley, 2006) or when describing their  
52 subjective experience of colour for different letters (Hupé, Bordier, & Dojat, 2012b). Using  
53 psychophysical tests, the synaesthetic experience of colour appears more similar to imagined or  
54 remembered than perceived colours (Witthoft & Winawer, 2013; Chiou & Rich, 2014; Hupé & Dojat,  
55 2015; Janik McErlean & Banissy, 2017). The experience of synaesthetic colours can be indeed  
56 formally described as a form of mental imagery, since it occurs without any corresponding spectral  
57 stimulation. The obligatory experience of colour when exposed to letters or digits may therefore  
58 justify the label of ‘intrusive visual imagery’ (Reeder, 2016). Unfortunately, this simplification does  
59 not help much with defining the phenomenological content of synaesthesia, since self-reports of  
60 mental imagery show at least as much diversity as those of synaesthesia (Galton, 1880), with mixed  
61 evidence about whether the presence of synaesthesia may relate to individual differences in mental  
62 imagery (Chun & Hupé, 2016). One may, however, study how much synaesthesia requires the neural  
63 resources involved in visual perception. This bottom-up approach, which does not address the  
64 phenomenological issue, can at least be operationalized. Moreover, grapheme-colour synaesthesia  
65 offers a unique opportunity regarding the neural correlates of imagination as it restrains both  
66 individual variability and the content specificity of visual imagery. Last but not least, synaesthetic  
67 colours are systematically triggered by letters and digits, unlike “regular” mental imagery that  
68 depends on both the good will and the (uneven) ability of subjects.

69 Several brain imaging studies have compared activations in the visual cortex for real and synaesthetic  
70 colours, whose majority did not reveal any overlap. There were even questions whether activations  
71 triggered by synaesthetic stimuli, when observed, were in fact related to the synaesthetic experience  
72 at all (Hupé & Dojat, 2015). This surprising ‘Null’ result may be due to methodological limitations  
73 since only massive univariate analysis of brain imaging data were used so far, which may reveal only  
74 processes well localized in the brain (Hupé et al., 2012b). Multivariate (multivoxel) Pattern Analysis

75 (MVPA) does not suffer from such a restriction. MVPA provides a way to reveal how information is  
76 encoded by the brain (Cox & Savoy, 2003; Norman, Polyn, Detre, & Haxby, 2006; Formisano &  
77 Kriegeskorte, 2012; Hebart & Baker, 2017). It has been applied successfully to the decoding of  
78 aspects of mental images (Thirion et al., 2006; Reddy, Tsuchiya, & Serre, 2010). Using fMRI, here we  
79 simply asked whether classifiers trained on patterns of blood oxygenation dependent signals (BOLD  
80 responses) elicited by different coloured stimuli could predict which synaesthetic colours were  
81 experienced by synaesthetes when seeing achromatic letters and digits. We studied in particular the  
82 early stages of visual processing by identifying cortical areas V1 to V4 in each subject, using  
83 retinotopic mapping, thus avoiding the problems related to structural normalization (Poldrack, 2007;  
84 Hupé, 2015). We also explored the whole visual cortex (including parts of the parietal cortex) using  
85 regions of interest based on a probabilistic atlas (Eickhoff et al., 2007), and performed whole brain  
86 searchlight analyses (Kriegeskorte, Goebel, & Bandettini, 2006). We compared all the measures  
87 obtained in synaesthetes with those obtained in a group of non-synaesthetes to take into account  
88 any potential non-specific effect related to the choice of stimuli. We also took into account the  
89 individual variability of the synaesthetic experience: without any possibility to characterize  
90 objectively the different phenomenological accounts, we measured the strength of the synaesthetic  
91 associations (Ruiz & Hupé, 2015).

92

## 93 **Materials and Methods**

### 94 **Participants**

95 We tested 20 synaesthetes and 20 non-synaesthetes. Synaesthetes (17 women) were between 21  
96 and 42 years old ( $M = 27.9$ ,  $SD = 5.5$ ). Recruitment was diverse and opportunistic, based on self-  
97 referral following publicity on internet: lab webpage, *Facebook* event, announcements on university  
98 networks in Grenoble and Paris. Potential participants, after a first phone interview, were asked by  
99 email to fill-up a questionnaire to describe their synaesthetic associations and for grapheme colour  
100 associations to send us a list of those. Synaesthetes were included if they had a sufficient and diverse  
101 number of letter-colour and digit-colour associations as required by the design of our experiments  
102 (see below). When they came to the laboratory to perform the experiments, they had a semi-  
103 directed interview to evaluate the phenomenology of their synesthetic associations. They also ran a  
104 modified version of the “Synaesthesia Battery Test” (Eagleman, Kagan, Nelson, Sagaram, & Sarma,  
105 2007) to choose precisely the colour of each letter and digit. This procedure was also used as a retest  
106 to confirm the validity of the first-person reports (Ruiz & Hupé, 2015): in all subjects, all chosen  
107 colours matched those indicated by print or by name in the questionnaire. In addition, objective

108 measurements of synaesthetic associations were obtained by Stroop-like tests (see below in the  
109 'Protocol' section). Seven of the included synaesthetes had already participated in psychophysics  
110 experiments between 2007 and 2010 (Ruiz & Hupé, 2015).

111 Control participants were recruited after synaesthetes to match their demographic statistics (16  
112 women, age range between 23 and 38 years old,  $M = 28.5$ ,  $SD = 4.3$ ), following similar advertisement  
113 strategies as well as soliciting colleagues at the Grenoble Institute of Neuroscience. Interviews were  
114 conducted to verify the absence of any type of synaesthesia, not only the absence of grapheme-  
115 colour associations. We chose not to run any consistency score with the control subjects in order not  
116 to prime them to do any voluntary association between graphemes and colours before the tests in  
117 the scanner. It could be argued that some of the controls may have had implicit synaesthetic  
118 associations they were not aware of, as it sometimes happens. In any case, this unlikely possibility  
119 could not bias our results because most of our analyses did not require any direct comparison of the  
120 performances by synaesthetes and controls.

121 The study was performed in accordance with the Declaration of Helsinki, it received approval by the  
122 Institutional Review Board of Grenoble (CPP 12-CHUG-17, approval date 04/04/2012) and written,  
123 informed consent was obtained from all subjects. A medical doctor verified that all subjects were  
124 without past or current brain disease and had no detected cognitive deficit. All subjects had normal  
125 colour perception on the Lanthony D-15 desaturated colour test (Richmond products), and normal or  
126 corrected to normal eyesight (then using MRI-compatible glasses).

## 127 **Materials**

128 Stimuli: for each synaesthete, we tried to identify four pairs of graphemes made of one letter and  
129 one digit that had similar colour associations. We never chose graphemes for which a synaesthete  
130 indicated several colours. We tried to find pairs of red, green, blue and yellow (R, G, B, Y) graphemes,  
131 but we were only partially successful and in some cases we selected a pair from the most saturated  
132 colours available. Figure 1 shows the actual letters and digits with colours used in the experiments.  
133 Only 13 subjects named the pairs red, green, blue and yellow; other colours were named orange,  
134 violet, fuchsia and brown, as well as light and dark blue or green. Syn08 and syn48 had a pair made of  
135 two letters. Since each synaesthete was tested with a different set of stimuli, each control subject  
136 was tested with the stimuli of a specific synaesthete (with the exception of syn10 who had no  
137 matched control, by mistake; two controls were tested instead with the stimuli of syn11. Paired  
138 comparisons were therefore based on 38 subjects).

139

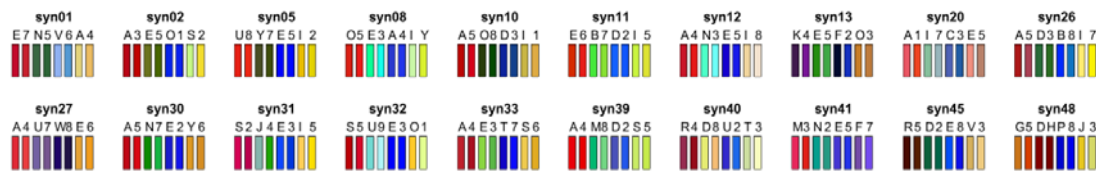

140

141

**Figure 1.** Letters and digits used for each synaesthete, with their corresponding synaesthetic RGB colours (the rendering of the colours using the projector in the scanner was different).

142

143

144

In the MR scanner, we presented these letters and digits in black at the centre of the screen (upper case, Helvetica font, extent up to 2 degrees eccentricity) over a grey uniform background (CIE xyY [0.29 0.3 77.4], half of the maximal luminance of the screen). Stimuli were projected on a translucent screen at the back of the scanner by a video projector Epson EMP 8200. We used a spectrophotometer (PhotoResearch PR 650) for colour and luminance measurements used to compute calibrated images. We also presented dynamic concentric rings (square luminance profile, similar to the stimuli used by Brouwer & Heeger, 2009, except for the absence of anti-aliasing so as to use only the colours selected by each synaesthete), with the exact same (real) colours as those chosen by each synaesthete for each grapheme. The choice of colours matching the individual grapheme 'R, G, B, Y' colour associations was done again by each synaesthete in the scanner over the same grey background, using a house-modified MRI compatible, comfortable, 10-button console controller, and the colour-picker of the "Synaesthesia Battery Test" as was done previously outside of the scanner. The same coloured rings were used for each matched control. The rings extent was also up to 2 degree eccentricity and the spatial frequency was 3 cycles/degree (six circles). The phase of the rings changed randomly at 6 Hz to almost nullify visual effects induced by the absence of anti-aliasing.

159

160

These stimuli were chosen with the purpose of training and testing classifiers (see below, "Data analysis: classifications"). Briefly, we wanted to use the BOLD responses to the coloured rings to train classifiers on colours, and the BOLD responses to graphemes to train classifiers on synaesthetic colours. This required choosing pairs of dissimilar graphemes, i.e. a letter and a digit, to try to avoid that the classifier trained on some shared form features, but rather on their common associated colour. This also implied that decoding should not be feasible that way based on the responses of control subjects. The use of pairs of graphemes also allowed the training on letters and testing on digits (or the reverse), with success in principle possible only for synaesthetes, based on their synaesthetic colour associations. The careful matching procedure of synaesthetic colours allowed the training of classifiers on real colours and testing on graphemes to identify which brain regions, if any,

169

170 coded both real and synaesthetic colours. Again, any decoding success would in principle be possible  
171 only in synaesthetes.

172 Classifiers would be trained and tested on four categories, 'R, G, B, and Y', referring either to the real  
173 or the synaesthetic prototypical colours that we tried to select. To maximize classification  
174 performances, categories should be perceptually disjoint. Figure 2 represents the actual colours used  
175 in the scanner for each synaesthete within the CIE L\*a\*b\* colour space, which is more perceptually  
176 uniform than the CIE xyY space. As was already obvious in Figure 1, differences of luminance were  
177 important to distinguish stimuli. Figure 2 illustrates that the colour and luminance distances were not  
178 similar across subjects between categories and within pairs, leading to unequal clusterisation. We  
179 could even expect some confusions by the classifiers for some subjects (e.g. "green/yellow" for  
180 syn11, "red/blue" for syn13 or "blue/yellow" for syn41). While the maximal theoretical performance  
181 achievable by classifiers was therefore below 100%, classifiers could however obtain more than the  
182 25% chance performance in every subject. For all the analyses (described below), we tested if the  
183 performance of classifiers across subjects was correlated with the ratio of colour distance (indicated  
184 for each subject in Table 1) as measured in the L\*a\*b\* space; we did not find any evidence of that,  
185 except for the classification of colours in the searchlight analysis, when testing the group of  
186 synaesthetes: we found one significant cluster (106 voxels, 2862 mm<sup>3</sup>), in the left fusiform gyrus,  
187 peaking at MNI XYZ = [-27 -73 -4], extending from about V4 to FG4, in line with the involvement of  
188 these regions in colour processing.

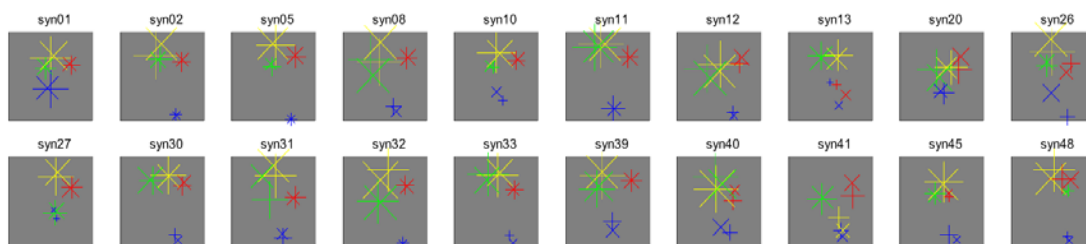

189  
190 **Figure 2.** Colour coordinates in the CIE L\*a\*b\* space of the stimuli used for each synaesthete, corresponding to the  
191 idiosyncratic synaesthetic colours of letters (+) and digits (x). The colours of the crosses are arbitrary and correspond to the  
192 four categories the classifiers had to distinguish. The size of the crosses is proportional to luminance (marker size = 0.4\*L,  
193 where max(L) = 100; axes limits are +/- 130, possible range being -128 to +127).

194

195 Note that luminance variations constitute a major difference, due to the constraint of using  
196 synaesthetic colours, with other MVPA studies of the neural correlates of colour processing, which  
197 used isoluminant stimuli (Brouwer & Heeger, 2009; Parkes, Marsman, Oxley, Goulermas, & Wuerger,  
198 2009). We do not know how differences along the luminance axis should be perceptually scaled to  
199 differences along the green/red opponent colours a\* axis and the blue/yellow opponent colours b\*

200 axis. This question is probably an ill-posed problem when studying brain correlates of colour  
201 perception, since at the cortical level visual circuits rely on both (but with different degrees) the  
202 parvo- and the magno-cellular pathways (Tootell & Nasr, 2017).

### 203 **Protocol**

204 Each subject ran three fMRI sessions of about 1 hour. In addition, synaesthetes ran a 1 hour  
205 psychophysics experiment (before or interleaved with fMRI experiments, depending on schedule  
206 availability) to measure the strength of their synaesthetic associations using variants of Stroop tasks.

207 All the details of the psychophysics experiment as well as the results of 11 synaesthetes are  
208 published (Ruiz & Hupé, 2015). Briefly, eight graphemes (repeated 36 times each) were presented  
209 randomly either with the colour chosen by each synaesthete (congruent condition) or with the  
210 synaesthetic colour of the other presented graphemes (incongruent condition). Synaesthete had to  
211 name as fast as possible the real colour of the grapheme ('colour' task). Response times were  
212 measured *a posteriori* based on the audio recording. The procedure was then repeated, but  
213 synaesthetes had this time to name as fast of possible the name of the synaesthetic colour (called a  
214 photism) they associated to each grapheme, which was also either congruent or incongruent with  
215 the real colour of the stimulus ('photism' task). The index of the strength of synaesthetic associations  
216 ('photism strength') combined two measures: the response time difference for congruent and  
217 incongruent stimuli in the colour task, which reflects the difficulty to inhibit synaesthetic  
218 associations; the response time difference to name the real and the synaesthetic colours (in the  
219 congruent condition), which reflects how easily synaesthetes retrieve the synaesthetic colour.

220 The data of one synaesthete (syn40) could not be analysed because the chosen orange and  
221 yellow/green colours revealed too similar (see Figure 2) and were not named consistently over the  
222 course of the experiment. Table I provides a summary of the data. It shows that even synaesthetes  
223 who obtained a relatively low score of photism strength (e.g., syn01) were very fast at naming the  
224 synaesthetic colour of letters and numbers, even though the real colour of the stimulus was  
225 systematically varied. Moreover, they very rarely made any mistake (Ruiz & Hupé, 2015). Such a task  
226 would be extremely difficult to perform by any non-synaesthete trying to memorize (without  
227 training) random colour associations. These data therefore provide a further objective validation of  
228 the genuineness of the synaesthetic experience of these participants as well as an estimate of the  
229 strength of the associations.

230



231

|             |     |     |                |                  | Colour    |             |                   | Photism   |             |               |
|-------------|-----|-----|----------------|------------------|-----------|-------------|-------------------|-----------|-------------|---------------|
|             |     |     |                |                  | Congruent | Incongruent | Congruency effect | Congruent | Incongruent | Photism delay |
| Synaesthete | Age | Sex | Distance ratio | Photism strength | CC        | CI          | CI-CC             | PC        | PI          | PC-CC         |
| syn01       | 21  | F   | 13             | <b>-107</b>      | 443       | 454         | 12                | 561       | 685         | 119           |
| syn02       | 21  | F   | 13             | <b>52</b>        | 466       | 543         | 77                | 491       | 543         | 25            |
| syn05       | 30  | F   | 38             | <b>20</b>        | 452       | 501         | 49                | 480       | 568         | 29            |
| syn08       | 35  | M   | 6              | <b>69</b>        | 484       | 585         | 101               | 516       | 619         | 32            |
| syn10       | 31  | F   | 9              | <b>40</b>        | 556       | 633         | 77                | 593       | 689         | 37            |
| syn11       | 28  | F   | 21             | <b>146</b>       | 643       | 782         | 138               | 636       | 681         | -7            |
| syn12       | 33  | F   | 9              | <b>136</b>       | 597       | 683         | 86                | 548       | 646         | -50           |
| syn13       | 29  | F   | 4              | <b>30</b>        | 668       | 744         | 76                | 714       | 795         | 46            |
| syn20       | 23  | F   | 4              | <b>19</b>        | 506       | 556         | 50                | 537       | 637         | 31            |
| syn26       | 27  | M   | 4              | <b>-19</b>       | 497       | 528         | 31                | 547       | 690         | 50            |
| syn27       | 24  | F   | 10             | <b>-4</b>        | 547       | 582         | 36                | 586       | 676         | 39            |
| syn30       | 27  | F   | 14             | <b>416</b>       | 466       | 844         | 378               | 427       | 449         | -39           |
| syn31       | 24  | F   | 6              | <b>20</b>        | 525       | 573         | 47                | 553       | 639         | 27            |
| syn32       | 33  | F   | 12             | <b>-57</b>       | 456       | 477         | 21                | 534       | 620         | 78            |
| syn33       | 30  | F   | 11             | <b>-30</b>       | 447       | 457         | 10                | 487       | 525         | 40            |
| syn39       | 26  | F   | 13             | <b>48</b>        | 440       | 523         | 83                | 475       | 582         | 35            |
| syn40       | 42  | F   | 5              | <b>NaN</b>       |           |             |                   |           |             |               |
| syn41       | 23  | F   | 6              | <b>-15</b>       | 484       | 514         | 30                | 529       | 678         | 45            |
| syn45       | 27  | F   | 10             | <b>10</b>        | 539       | 564         | 25                | 554       | 691         | 16            |
| syn48       | 22  | M   | 9              | <b>-73</b>       | 487       | 529         | 42                | 602       | 770         | 115           |

232

233 **Table 1.** Demographics and characteristics of the tested synaesthetes. The variable ‘Distance ratio’ is a measure of  
 234 clusterisation of the pairs of colour (average between-cluster distance divided by average within-cluster distance, measured  
 235 in the L\*a\*b\* space). The higher the value, the better the clusterisation (see Figure 2). The variable ‘Photism strength’ is the  
 236 measure of the strength of synaesthetic associations as developed by Ruiz et al. (2015), based on the results of Stroop like  
 237 tests. The next columns indicate the median time measured in *ms* for each subject to name either the real (‘Colour’) or the  
 238 synaesthetic colour (‘Photism’) of the letters and numbers shown in Figure 1, when the real colour was either congruent or  
 239 incongruent with the synaesthetic colour indicated by each synaesthete. The ‘Congruency effect’ was measured as the  
 240 difference of response time in the ‘Colour’ condition. ‘Photism delay’ is the difference between naming the real and the  
 241 synaesthetic colours, and ‘Photism strength’ is the difference of these two values. The interpretation of this index is only  
 242 relative (the zero value does not have any special meaning). The data of syn40 data were not consistent (see text).

243

## 244 **fMRI experiments**

245 The MR experiments were performed at the IRMaGe MRI facility (Grenoble, France) with a 3T Philips  
246 Intera Achieva, using a 32 channels coil. The experiments can be decomposed successively in three  
247 “sessions” (about 1 hour each), “runs” (a few minutes), “blocks” (1 minute) and “events” (1 second).  
248 One session was dedicated to retinotopic mapping and functional localizer runs using pictures of  
249 objects, words and coloured stimuli (Mondrian). These latter runs were included to test whether  
250 voxels involved in the decoding of synaesthetic colours were located in regions well-defined  
251 functionally, respectively the Lateral Occipital Complex (LOC: Grill-Spector, Kourtzi, & Kanwisher,  
252 2001), the Visual Word Form Area (VWFA: Dehaene & Cohen, 2011) and “colour centres” (Hupé et  
253 al., 2012b). We did not have the opportunity to use those localizers (see Results). Retinotopic  
254 mapping was performed strictly as described in a previous study (Bordier, Hupé, & Dojat, 2015),  
255 using the Brain Voyager analysis pipeline to define in each subject the ventral and dorsal as well as  
256 the left and right parts of areas V1, V2, V3 and V4 (ventral only). The parameters of the EPI functional  
257 images were TR/TE: 2000/30 ms, excitation pulse angle: 80°, acquisition matrix: 80x80, bandwidth:  
258 54.3 Hz/pixel, isotropic nominal resolution: 3 mm, 30\*2.75 mm thick slices with 0.25 mm interspace  
259 covering the whole visual cortex, with four additional dummy scans. To allow the precise alignment  
260 of functional scans across sessions, a high-resolution structural image of the brain was also acquired  
261 using a T1-weighted MP-RAGE sequence. The sequence parameters were TR/TE: 25/2.3 ms,  
262 excitation pulse angle: 9°, 180 sagittal slices of 256\*240 (read x phase), bandwidth: 542.5 Hz/pixel  
263 isotropic nominal resolution: 1 mm, for a total measurement time of 4 min 31 s.

264 Another session was dedicated to the “synaesthesia” protocol (a structural image was also acquired  
265 with the same parameters as in the first session, in the middle of the functional runs). Twelve  
266 functional runs were acquired. The parameters of the EPI functional images were identical to those  
267 used for the retinotopic mapping experiment but TR: 2500 ms for an acquisition volume of 45 slices  
268 covering the entire brain with a total measurement time of 3 min 47 s. In each functional run, stimuli  
269 of one type only were presented: letters, digits, concentric rings with the synaesthetic colours of  
270 letters, or concentric rings with the synaesthetic colours of digits. The session contained three  
271 successive sequences of four runs, each run with a different stimulus type (with a different random  
272 order of stimulus type in each sequence). Each run contained 3\*60 s blocks of a rapid-event  
273 paradigm, separated by 10 s fixations. Stimuli of different “colours” were presented pseudo-  
274 randomly in each block to optimize the estimation of the main effects. For example, in a letter block  
275 for syn01 and her matched control, the letters E, N, V and A were presented six times each for 1 s,  
276 with 1 s +/- 333 ms fixation only between each letter. This protocol allowed an estimation of the  
277 BOLD response to each letter in each block (beta weights, using a General Linear Model, see below)

278 based on six presentations. We obtained three estimations (betas) in each run for each “colour”, for  
279 a total of thirty-six estimates ( $9 * 4$  “colours”) for each type of stimulus to be used by classifiers. The  
280 power of classification algorithms depends on both the number and quality (signal to noise ratio) of  
281 estimates (called exemplars). The present compromise between quantity and quality was based on  
282 (Mumford, Turner, Ashby, & Poldrack, 2012) and on preliminary experiments (Ruiz, Hupé, & Dojat,  
283 2012). Subjects had to fixate the centre of the screen (the fixation point, present between stimuli and  
284 at the centre of the coloured rings, or the centre of the grapheme) and pay attention to the stimuli  
285 for the whole duration of each run. To help subjects maintain attention, they performed a one-back  
286 task (pressing a button each time the same stimulus was repeated twice in a row).

287 In the remaining session, a high-resolution, high-contrast structural image of the brain was acquired  
288 using a T1-weighted MP-RAGE sequence. The sequence parameters were TR/TE/TI: 25/3.7/800 ms,  
289 excitation pulse angle:  $15^\circ$ , acquisition matrix: 180 sagittal slices of  $256 * 240$  (read x phase),  
290 bandwidth: 191 Hz/pixel, readout in antero-posterior direction, number of averages: 1, sense factor  
291 antero-posterior: 2.2, right-left: 2, isotropic nominal resolution: 1 mm, with a total measurement  
292 time of 9 min 41 s. This image was the structural reference image of each subject. We also acquired  
293 diffusion-weighted images, analysed in another study (Dojat, Pizzagalli, & Hupé, 2018) and a  
294 sequence of functional resting state (not analysed yet).

295 We recorded oculomotor signals during the scans with an ASL EyeTracker 6000. At the beginning of  
296 each session, subjects had to fixate each point of a calibration matrix, and were therefore aware that  
297 the quality of their fixation was monitored. However, signal quality in some subjects was not good  
298 enough or not constant, or even too poor to be of any use for subjects who had to wear non-  
299 magnetic glasses in the scanner, so we did not even attempt to analyse these data. We can only  
300 speculate that subjects had a better fixation than if they did not know that their gaze was recorded.  
301 Whole brain univariate analyses did not reveal any activation along the anterior calcarine and the  
302 parieto-occipital sulcus, where activations correspond to the signature of blinks (Hupé, Bordier, &  
303 Dojat, 2012a), providing indirect evidence that the distributions of blinks were not correlated with  
304 our stimuli presented randomly.

### 305 **Data Analysis**

306 The standard pre-processing procedure of functional images was applied using SPM8: slice-timing  
307 correction, then motion correction with realignment, together with correction of spatial distortions  
308 of the static magnetic field (Vasseur et al., 2010). The within session structural image was realigned  
309 to the mean EPI image, as well as the high resolution high contrast structural image, but no further  
310 transformation of the EPI images was performed. No spatial smoothing was applied for MVPA, as

311 maximally differential activation of voxels was shown to maximize the power of classifiers (Ruiz et al.,  
312 2012). This was confirmed on these data when testing spatial filters with FWHM = 3, 6 and 9 mm.  
313 Transformation matrices were computed between the structural image and the MNI template to  
314 allow the transformation and projection of atlas-based masks of specific anatomical structures  
315 (Anatomy Toolbox for SPM8 Version 2.2b, 2016) into the subject's space.

316 For MVPA (our main analysis), for each subject and each run we first ran a General Linear Model  
317 (GLM). The six parameters of motion correction were included as factors of non-interest in the design  
318 matrix. Thirteen main predictors, four events (grapheme or colour) \* three blocks plus one for when  
319 only the fixation point was shown, were obtained by convolving the canonical HRF with Dirac  
320 functions corresponding to the time of presentation of each stimulus. The corresponding beta  
321 weights estimated by the GLM for each colour (real or synaesthetic) and stimulus type (ring or  
322 grapheme), divided by the square root of residuals, were used as examples by a Support Vector  
323 Classification (SVC) algorithm (Scikit-learn version 0.15.2, implemented in Python version 2.7.9.0:  
324 Pedregosa et al., 2011). We used a linear kernel (default value of the C parameter = 1) and a one-  
325 versus-one classification heuristic to classify each example in one of the four categories. For all five  
326 classifications describes below, training and test runs were always fully independent: betas obtained  
327 from blocks from the same run were never split between training and test runs.

328 **Classifications.** We trained and tested five families of classifiers (Figure 3). Six runs (eighteen blocks)  
329 were used for colour ('Col' family of classifiers) and synaesthesia ('Syn') decoding. The procedure was  
330 leave-one-run-out. Six classifiers were therefore trained to classify (5 runs \* 3 blocks \* 4 colours = 60)  
331 colour exemplars in four categories, and tested on (1 run \* 3 blocks \* 4 colours = 12) independent  
332 exemplars. Performance was therefore computed over seventy-two classifications (6 classifiers \* 12  
333 tested exemplars), with chance level = 25% and 95% Confidence Interval of chance for each subject =  
334 [16 36]% (binomial probability, Agresti-Coull estimation). For grapheme runs, training was performed  
335 on pairs made of one letter and one digit. If the decoder learnt only the letters, for example (by being  
336 able to filter out the responses to digits), then performance on decoding letters and digits could  
337 reach up to 50%, without knowing anything about synaesthetic colours. One could expect, however,  
338 that performance of synaesthetes would be higher than for controls because of the additional  
339 information provided by synaesthetic colours. A more stringent test of synaesthetic coding ('g1g2')  
340 was the training of one classifier on letters (3 runs \* 12 exemplars) and testing on digits (and the  
341 reverse). Learning was achieved using thirty-six exemplars (letters or digits) to be classified in four  
342 categories, test was on thirty-six exemplars (digits or letters), for a total performance over seventy-  
343 two classifications by combining training on letters and training on digits. To evaluate if brain regions  
344 coded both real and synaesthetic colours ('C2S'), training was performed by one classifier on six

345 colour runs (seventy-two exemplars), test on six grapheme runs (seventy-two exemplars). We also  
 346 performed the reverse classification ('S2C').

347

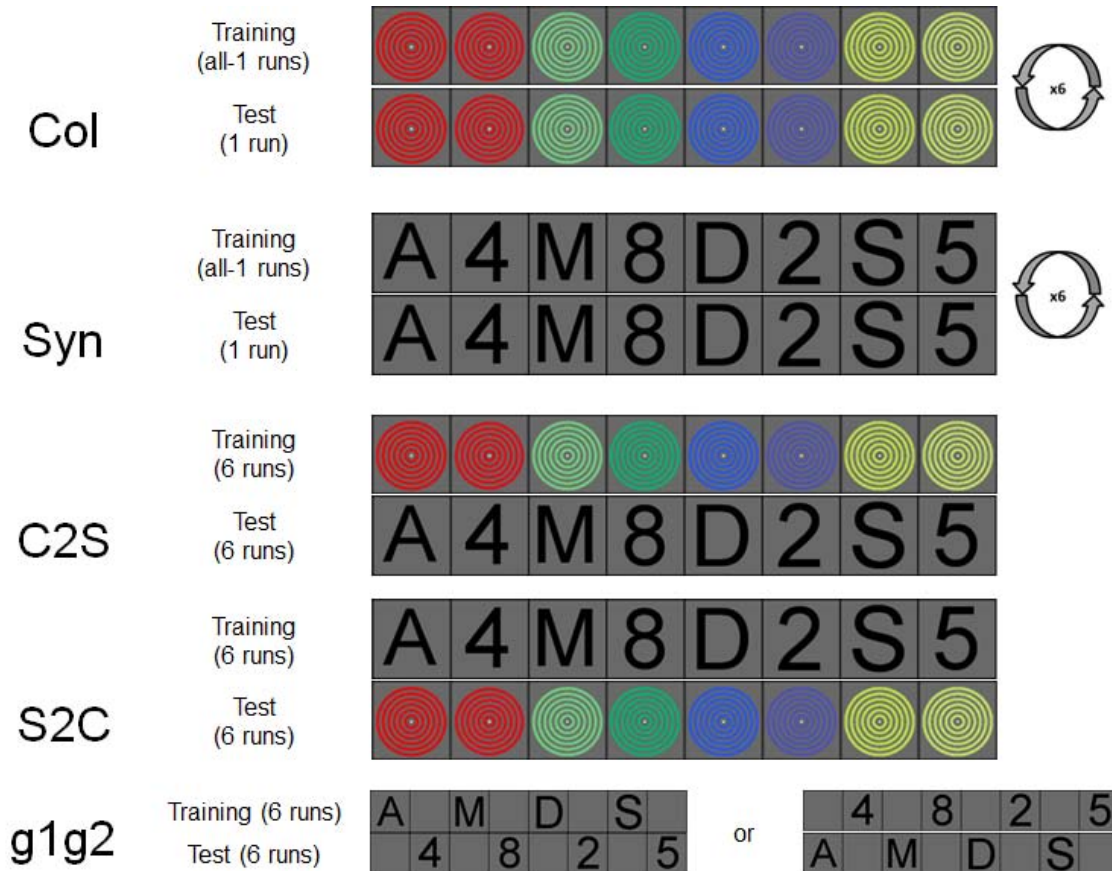

348

349 **Figure 3.** MVPA classifications. 'Col' classification: The procedure was leave-one-run-out. Six classifiers were trained to  
 350 classify 60 colour exemplars from 5 runs in four categories, and tested on 12 independent exemplars of the remaining run.  
 351 Performance was therefore averaged over seventy-two classifications (6 classifiers \* 12 tested exemplars). 'Syn'  
 352 classification: The procedure was the same as for the 'Col' classification, based on pairs of graphemes and therefore also  
 353 synaesthetic colours for synaesthetes. 'C2S' classification: Training was performed by one classifier on six colour runs  
 354 (seventy-two exemplars), test on six grapheme runs (seventy-two classifications). 'S2C' classification: The procedure was  
 355 the same as for the 'C2S' classification. 'g1g2' classification: Classifiers were trained on letters (3 runs \* 12 exemplars) or  
 356 digits (3 runs) and tested respectively on digits or letters. Overall performance was based on seventy-two classifications.

357

358 We computed MVPA in regions of interest (ROIs) defined in each native (non-transformed) subject  
 359 space. We used visual areas defined by individual retinotopic mapping as well as atlas-based ROIs  
 360 (Figure 4). We expected synaesthetic colours to involve the ventral visual pathway, anterior to V4, so  
 361 we tested the four subdivisions of the fusiform gyrus (FG, Figure 4a). Some studies have also

362 suggested the role of parietal areas, even though no consensus emerged about exactly which part if  
363 any may be involved (Hupé & Dojat, 2015), so we defined ROIs in parietal regions (Figure 4b).

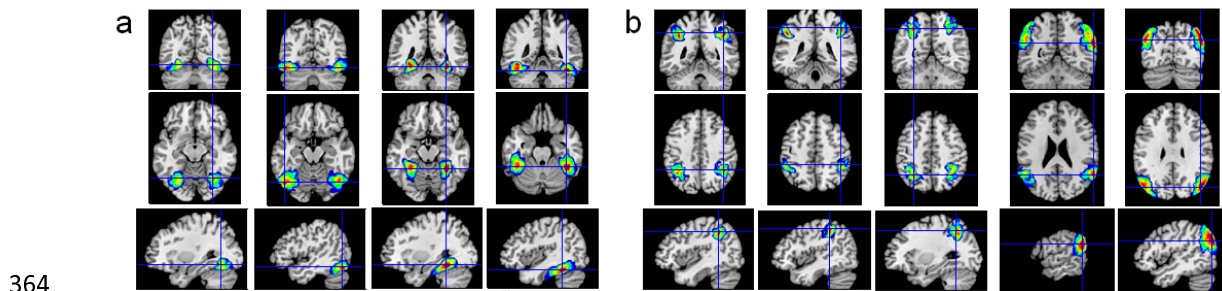

365 **Figure 4. a.** Atlas-based regions of interest (ROI) of the fusiform region. From left to right, FG1, FG2, FG3 and FG4. Colour  
366 gradients denote the probability of being in the specified ROI, from 0% (dark blue) to 100% (dark red). We considered the  
367 largest ROI as the mask of the corresponding region. **b.** Parietal ROIs. From left to right, AIPS\_IP1, AIPS\_IP2, AIPS\_IP3,  
368 IPL\_PGa and IPL\_PGp. See text for full names and references of these areas.

369

370 For each subject, anatomical ROIs were defined as the intersection of the subject's grey matter mask  
371 and the mask of the anatomical ROIs (Anatomy Toolbox for SPM8: Eickhoff et al., 2007) projected  
372 into the subject's space. Both retinotopic and atlas-based ROIs had different number of voxels within  
373 and across subjects. The performance of classifiers may depend on the number of voxels (called  
374 "features" for the algorithm), making difficult the comparison of absolute performance in different  
375 ROIs. Between-subject differences may also bias group comparisons.

376 To address this issue, we first tested ROIs of different sizes by regrouping retinotopic areas and  
377 subdivisions of the fusiform areas and of the parietal areas. The pattern of results were similar  
378 whatever our grouping choice of ROIs. We present the results for ROIs of intermediate size (we  
379 indicate the min and max number of voxels across subjects in each ROI), regrouping the right and left  
380 parts of retinotopic areas (V1 = [206 441], V2 = [125 420], V3 = [156 340], V4 = [94 268]), the two  
381 posterior (J. Caspers et al., 2013) (left = [98 150], right = [61 125]) and anterior (Lorenz et al., 2017)  
382 (left = [174 331], right = [127 271]) parts of the fusiform areas, the 3 subdivisions of the Intaparietal  
383 Sulcus (Choi et al., 2006; Scheperjans et al., 2008) (left = [197 311], right = [191 275]) and the anterior  
384 and posterior parts of the Inferior Parietal Lobule (S. Caspers et al., 2006; S. Caspers et al., 2008) (left  
385 = [131 335], right = [124 279]).

386 We also defined ROIs using the same number of voxels in each subject and ROI. To do that, for all  
387 classifications, we selected 100 voxels with the highest F-scores to colours in each area (we tested  
388 different selection sizes and found that 100 was about the optimal number of voxels to reach  
389 maximum performance). In order to have enough voxels to choose from in every subject, we

390 selected voxels in only six large areas: the left and right retinotopic areas V1 to V4 (minimum number  
391 of voxels across subjects were respectively 352 and 327), the left and right fusiform areas FG1 to FG4  
392 (298 and 188) and the left and right parietal areas (347 and 315). Such a selection provides the best  
393 chances for colour classifiers (since we select voxels maximally modulated by colours), but  
394 classification is then not independent of selection when measuring colour decoding after selection of  
395 F-scores to colours (but classification is independent for grapheme decoding). In order to provide a  
396 fair measure of colour decoding performance to compare grapheme decoding with, voxels were  
397 selected using F-values computed based only on runs used for training, meaning that each of the six  
398 training sets was based on a different set of voxels. For other classifications, the same set of voxels  
399 was used based on F-values computed across all colour runs.

#### 400 **Statistical analysis**

401 In each ROI, we computed 95% CIs of the performance of each group, as well as the 95% CIs of the  
402 between group differences. We performed both independent and paired comparisons. Paired  
403 comparisons are in principle more appropriate and powerful with this protocol, because it cancels  
404 any difference due to the specific choice of colours and graphemes; however, for voxels not  
405 concerned with those small differences, pairing is artificial and may just bring some noise. Results  
406 were in any case very similar for both comparisons. We show the CIs for paired comparisons. We also  
407 performed paired comparisons by computing the 95% CI of the odds ratio when comparing 19  
408 synaesthetes against their matched controls, using a mixed-effect generalized linear model, with a  
409 binomial family and a logit link function, as implemented in the library lme4 (Bates, Mächler, Bolker,  
410 & Walker, 2015) in R, version 3.3.3.

411 In order to fully exploit our data set, we performed two additional analyses.

412 A searchlight analysis was performed over the whole brain (Kriegeskorte et al., 2006). Whole brain  
413 analyses are in principle less powerful than ROI analyses because they constrain to distort each  
414 subject's anatomical space within one common space, so the average performance at any given voxel  
415 may in reality correspond to different anatomico-functional voxels in different subjects. Moreover,  
416 they re-introduce the methodological issues related to spatial smoothness (Stelzer, Lohmann,  
417 Mueller, Buschmann, & Turner, 2014). This analysis was therefore exploratory. It allowed us to  
418 discover other clusters potentially involved in synaesthesia, which we could further analyse as post-  
419 hoc regions of interest to see if they displayed a consistent pattern of results across classifiers. The  
420 searchlight analysis used a 15 mm radius and the SVC algorithm. Performance maps were  
421 transformed to the common DARTEL space for voxel-wise group comparisons (resolution 3 by 3 by 3  
422 mm). We performed in SPM8 two-sample (groups of 20 subjects) and paired-sample t-tests (N = 19)

423 between synaesthetes and controls, as well as one-sample t-tests to compare the average  
424 performance of each group (N = 20) against chance (= 0.25). For all comparisons, no individual voxel  
425 reached  $p_{FWE} < 0.05$ . We used cluster-based statistics with the cluster-forming threshold set to  $p =$   
426 0.001 and  $p_{FWE} < 0.05$ .

427 We also performed whole-brain univariate analyses on the groups of synaesthetes and controls to  
428 test for differences of magnitude of the BOLD responses to graphemes evoking synaesthetic colours.  
429 The design of the experiment was not optimized for these analyses since we did not have any control  
430 stimuli (those being not necessary for MVPA). The rationale was the same as for the whole brain  
431 searchlight analysis: if any difference was found between synaesthetes and controls, the revealed  
432 clusters could be defined as post-hoc regions of interest for our classifiers to test if those regions  
433 were involved in coding synaesthetic colours. A 9 mm FWHM spatial smoothing was applied to the  
434 subjects' EPI images before testing two contrasts: a T-contrast of all stimuli against the fixation point  
435 (we did not have graphemes that did not evoke any synaesthetic colour); an F-contrast of the four  
436 pairs of graphemes. Contrast maps were distorted within the study-specific template computed using  
437 DARTEL procedure as implemented in VBM8 (Dojat et al., 2018) and to the MNI space (resolution 1.5  
438 by 1.5 by 1.5 mm). For second-level analyses, we compared the contrast maps of synaesthetes (N =  
439 20) against controls (N = 20) using t-tests (testing stronger signals either in synaesthetes or controls).  
440 We also performed paired t-tests on 19 synaesthetes against their matched control to account for  
441 possible differences due to the specific choices of graphemes in each synaesthete. For all  
442 comparisons, no individual voxel reached  $p < 0.05$ , corrected for the family-wise error (FWE, based  
443 on the random field theory as implemented in SPM8). We used cluster-based statistics with the  
444 cluster-forming threshold set to  $p = 0.001$  (Eklund, Nichols, & Knutsson, 2016) and  $p_{FWE} < 0.05$ . As a  
445 final control analysis, we performed the same analyses for coloured stimuli.

446 **Data Availability.** The datasets generated and analysed during the current study are freely available  
447 on request (<https://shanoir.irisa.fr/Shanoir/login.seam>), contact M. Dojat. The data are not publicly  
448 available due to privacy restrictions.

449

450

## 451 **Results**

### 452 **Multivariate pattern analysis in regions of interest (defined at the individual level)**

453 Figure 5 shows the performance of all classifiers (described in Figure 3) in all our ROIs, without any  
454 voxel selection (ROIs have therefore different number of voxels across regions and subjects).



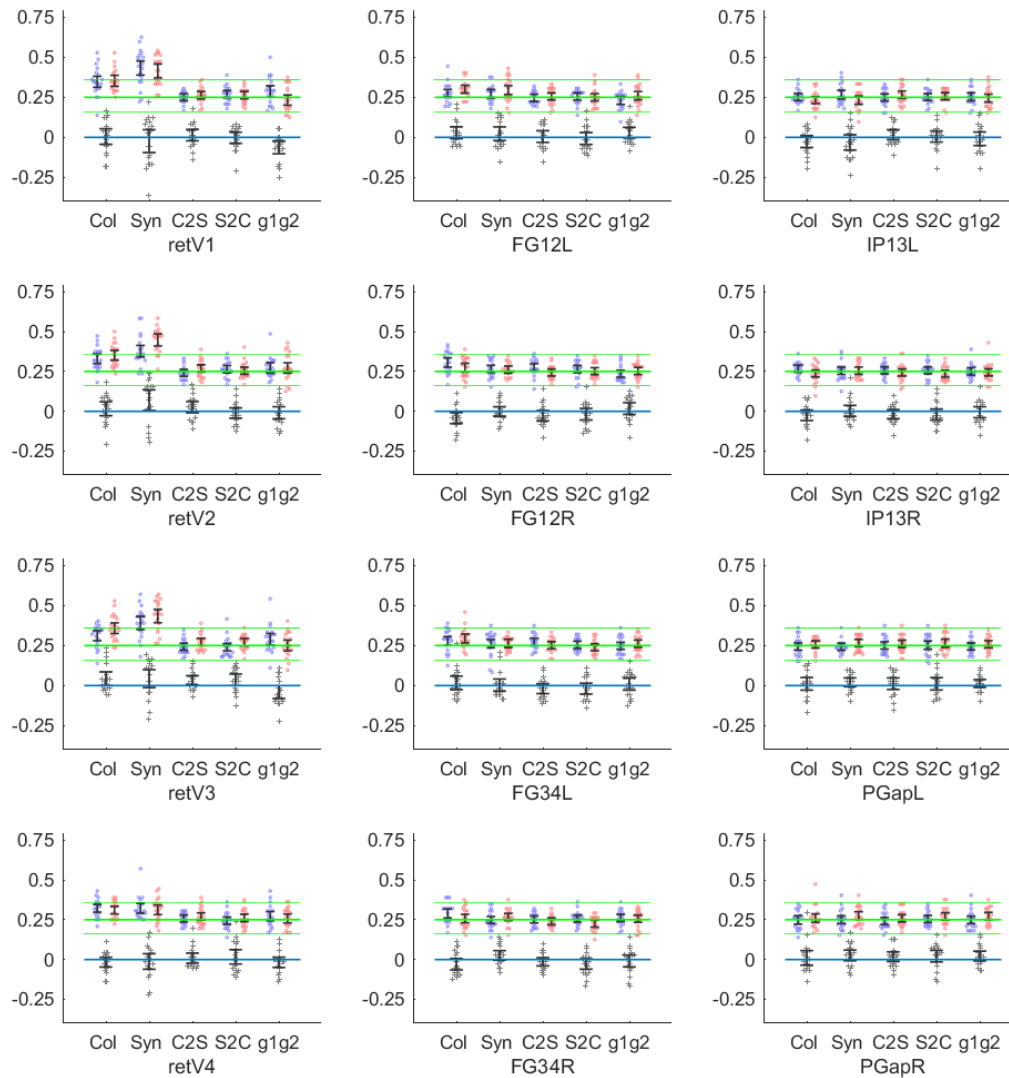

455

456 **Figure 5.** Performance of classifiers in retinotopic areas, the fusiform gyrus and parietal areas. Each ROI regrou ped several  
 457 areas, for example the left and right parts of V1 for 'retV1' in order to provide a large number of voxels in each subject and  
 458 ROI (at least > 60, and > 100 voxels in most ROIs; see Methods: Data Analysis). 'retV1' to 'retV4' were defined based on  
 459 retinotopic mapping in each subject; other ROIs were defined as the intersection of the subject's grey matter mask and the  
 460 mask of atlas-based anatomical ROIs (Anatomy Toolbox for SPM8) projected into the subject's space (see Figure 4). FG12L =  
 461 left (FG1 + FG2), IP13L = left (AIPS\_IP1 + AIPS\_IP2 + AIPS\_IP3), PGapL = left (IPL\_PGa + IPL\_PGp), etc. Each classifier was  
 462 trained and tested on beta weights computed on voxels in the native subject space with no spatial smoothing. Each panel  
 463 displays the individual and average performances of five classifiers (see Figure 3): 'Col' = training and test on betas for real  
 464 colours (rings); 'Syn' = training and test for synaesthetic colours (graphemes, letters or digits); 'C2S' = training on real  
 465 colours (rings) test on synaesthetic colours (graphemes); 'S2C' = training on synaesthetic colours test on real colours; 'g1g2'  
 466 training on letters test on digits or training on digits test on letters. The y-axis represents both the *performance* of classifiers  
 467 (between 0 and 1, chance level = 0.25, thick green line; 95%CI of chance for each subject = [0.16 0.36], thin green lines) for  
 468 individual subjects (blue = controls, red = synaesthetes) and their group average (with 95% Confidence Intervals) and the  
 469 *difference of performance* (grey crosses) between synaesthetes and their matched controls (0 = no difference between  
 470 groups, blue line; whiskers denote 95% CI).

471 In each subplot, the first two beeswarms from the left show the performance of decoders in each  
472 subject for real colours ('Col' classification). As expected, the decoding of real colours was above  
473 chance (0.25, thick green line) in retinotopic areas as well as in the fusiform gyrus for both controls  
474 (blue points) and synaesthetes (red points). No difference was expected nor observed between  
475 groups (whiskers across the zero blue line denote the 95% CI for paired comparisons of performance  
476 of 19 synaesthetes against their matched control, the difference of performance being denoted by  
477 the grey crosses). Note though that the whole 95% CI was slightly above 0 in retinotopic V3, 'retV3',  
478 and it was slightly below 0 in the subdivisions 1 and 2 of the right fusiform gyrus, 'FG12R' (differences  
479 are more visible when estimating the CI by a mixed-effect generalized linear models: Supporting  
480 Information, Figure S4). But without any independent evidence, these small differences could be due  
481 to random sampling. Indeed, all the 99.58% CIs included 0 (Bonferroni correction over 12 tests).

482 The next beeswarms are for the classification of pairs of graphemes. In synaesthetes only,  
483 classification could in principle be achieved based on the synesthetic colours, since the synesthetic  
484 colour was the main shared feature associated to each grapheme pair (in most cases one letter and  
485 one digit) had in common (so we called it the 'Syn' classification). For example, E and 7 were both  
486 associated to red by syn01 (see Figure 1). Performance was above chance level (25%) in controls. This  
487 means that this performance could be achieved by classifiers based on either some spatial features  
488 shared by each grapheme pair or by optimizing decoding to only one of the graphemes. In order to  
489 test whether graphemes could be decoded on the basis of synaesthetic colours, we looked if  
490 synaesthetes performed better than controls. This was the case in retinotopic V2 (95% CI of the  
491 difference of performance, two-sample t-test: [1.5 12.5]%; paired t-test: [0.5 13.4]%; 95% CI of the  
492 odds ratio = [1.15 1.56]; see Methods, statistical analysis) and to a lesser extent in retinotopic V3 (but  
493 note that performance was lower for synaesthetes in the subdivisions 1 to 3 of the left Intra-Parietal  
494 Sulcus, IP13L; such a difference is most likely due to random sampling since none of the group  
495 performances in IP13L was above chance). Only the difference in V2 survived Bonferroni correction  
496 over 12 tests, for the mixed-effect analysis ( $p = 0.0002$ ).

497 The third group of beeswarms represent the data answering our main question: can synaesthetic  
498 colours be decoded based on real colours ('C2S' classification)? This was not the case in any ROIs we  
499 considered in controls, as expected, but also in synaesthetes (the 95% CI of all groups crossed the  
500 0.25 chance baseline). In particular, performance was not significantly above chance in V2, as would  
501 have yet been expected if the higher performance in synaesthetes for the 'Syn' classification was  
502 really due to the coding of synaesthetic colours. Moreover, there was no evidence of better  
503 classification in synaesthetes than controls. We obtained similar null results when we tried to decode

504 real colours based on graphemes (and possibly synaesthetic colours in synaesthetes: ‘S2C’  
505 classification).

506 The last beeswarms on the right of each subplot show the performance for another classification that  
507 should have been possible only on the basis of synaesthetic colours: classifiers were trained on one  
508 set of graphemes (digits or letters) and tested on the other set of graphemes (‘g1g2’ classification).  
509 Again, performance was never above chance and we found no difference between groups, in  
510 particular in V2. We even observed lower scores for synaesthetes in V1 (where it even survived  
511 Bonferroni correction for the mixed-effect analysis:  $p = 0.0002$ ) and V3, where we had yet observed  
512 higher performance for ‘Syn’ decoding. This lack of consistency across different tests addressing the  
513 same question confirmed that these small variations, even when statistically “significant”, were most  
514 likely due to random sampling.

515 We performed again all these analyses using six larger ROIs (regrouping either the left or the right  
516 parts of V1 to V4, FG1 to FG2 and the areas of the inferior parietal lobule and the intraparietal sulcus)  
517 in which we selected the 100 voxels with the largest scores to F-tests to real colours, in order to feed  
518 the classifiers with the voxels most sensitive to real colours (Figure 6). The performance of the ‘C2S’,  
519 ‘S2C’ and ‘g1g2’ classifiers was never above chance in synaesthetes (nor in controls, as expected),  
520 and performance was never better in synaesthetes.

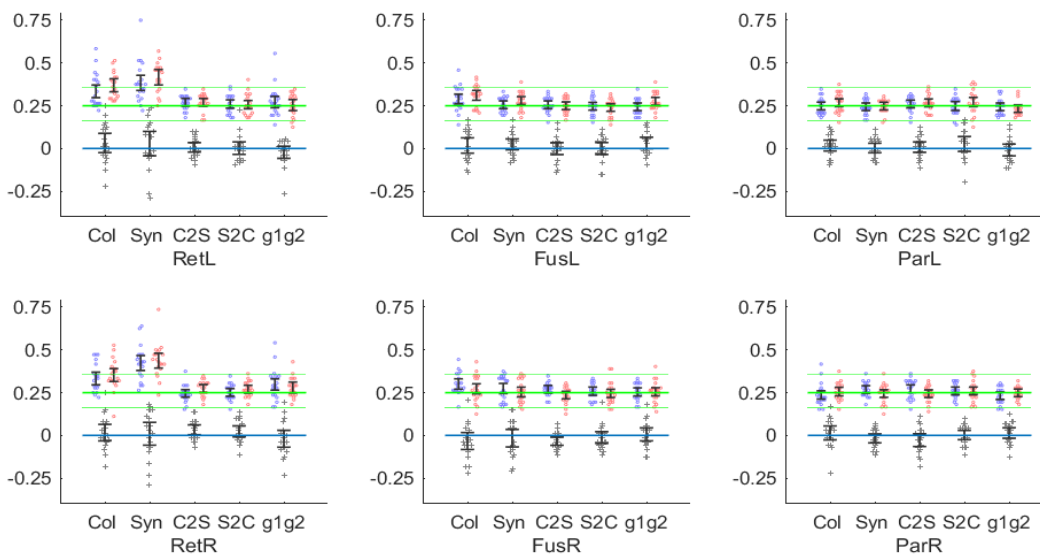

521  
522 **Figure 6.** Performance based on the same number of voxels (= 100) in each large ROI (retinotopic areas, fusiform gyrus and  
523 parietal regions) and subject. For the classification of real colours (‘Col’), the selection of the best F-values to colours was  
524 different for each of the six leave-one-out classifications, based each time only on the five runs used for training the  
525 classifier, to insure independence of training and test. For the other selections, all colour runs were used to select the  
526 voxels with the highest F-scores. The high performance for the ‘Syn’ classification in retinotopic areas indicates that many  
527 voxels respond both to change of colour or luminance and the shape of graphemes, probably thanks to the small receptive

528 fields of lower visual areas. Same conventions as in Figure 5. The CIs of the odds ratio computed by mixed-effect  
529 generalized linear models are shown in Supporting Information, Figure S5.

### 530 Individual differences

531 The phenomenological experience of synaesthetic colours may vary a lot across synaesthetes, which  
532 may compromise the visibility of effects at the group level. While this phenomenology has been so  
533 far problematic to capture with objective measures, we could estimate the strength of the  
534 synaesthetic associations in each subject, using variants of Stroop tasks. We reasoned that  
535 synaesthetes with stronger synaesthetic associations might have stronger modulations of the BOLD  
536 signal and thus larger decoding values. We first tested area V2, where we had observed on average  
537 higher performance in synaesthetes for the 'Syn' classification. We were wondering if this higher  
538 performance was really due to the coding of synaesthetic colours, because our other, more specific  
539 classifiers ('C2S', 'S2'C and 'g1g2'), had not revealed any difference. A correlation between  
540 synaesthetic strength and performance would constitute an independent validation of coding. Figure  
541 7 shows the performance of each subject as a function of the strength of synaesthetic associations,  
542 measured in Stroop-like psychophysics experiments (see Table 1 and Ruiz & Hupé, 2015, for further  
543 explanations about the 'Photism Strength' index) for synaesthetes only (red crosses). Controls (blue  
544 circles) were attributed the value of their matched synaesthete.

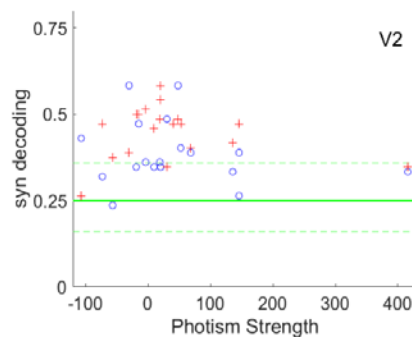

545

546 **Figure 7.** Performance of the classifier trained and tested with synaesthetic colours (pairs of graphemes) in each subject in  
547 area V2 defined retinotopically (same data as 'Syn' in the second panel of the first column of Figure 5) as a function of the  
548 strength of synaesthetic associations ('Photism Strength'). This strength, measured for synaesthetes (red crosses), does not  
549 show any evidence of correlation with the performance of the 'Syn' decoder ( $r = -0.11$ , 95% CI = [-0.54 0.36]). Controls (blue  
550 circles) were attributed the value of their matched synaesthete ( $r = -0.18$ , 95% CI = [-0.58 0.30]). Note that one value of  
551 Photism Strength was larger than the other ones. We carefully checked that this value was correct. However, given its  
552 possible influence on the correlation results, we complemented this analysis with two other analyses, by removing this  
553 value (for synaesthetes,  $r = 0.28$ , 95% CI = [-0.21 0.66]) and by performing non-parametric correlations (Spearman  $r = -0.03$ ,  
554  $N = 19$ ,  $p = 0.90$ ). We compared the results of these three statistical tests for all the other tested correlations. The statistical  
555 conclusions were always similar, except for one case described in Supporting Information, Figure S2.

556 There was no correlation between both measures, neither for synaesthetes nor, as expected, for  
557 controls. We also observed that the difference of score between each synaesthete and her (or his)  
558 matched control did not increase with photism strength ( $r = 0.06$ , 95% CI = [-0.42 0.52]; Spearman  $r =$   
559  $0.01$ ,  $N = 18$ ,  $p = 0.95$ ). Therefore, this analysis did not provide any independent argument in favour  
560 of the decoding of synaesthetic colours in V2. We computed similar correlation analyses in every ROI  
561 and for all classifiers and never found any correlation (all uncorrected  $p > 0.05$ ). We also computed  
562 both positive and negative correlations over the whole brain for the five classifiers, independently for  
563 synaesthetes and controls. We never found any significant cluster (cluster forming threshold,  $p =$   
564  $0.001$ ).

### 565 **Whole brain searchlight multivariate pattern analysis**

566 We complemented our ROI analysis with searchlight analyses over the whole brain (normalized to  
567 the MNI space), comparing the performance of each group against chance as well as comparing  
568 groups for the five classifications. These exploratory analyses were performed to discover clusters  
569 potentially involved in synaesthesia outside of our ROIs. “Significant” clusters could be used as post-  
570 hoc regions of interest to see if they displayed a consistent pattern of results across classifiers (these  
571 results are displayed in Supporting Information, Table S1). We found no differences between controls  
572 and synaesthetes at our statistical threshold for classifiers trained and tested on colours (rings, ‘Col’  
573 classifiers). For classifiers trained and tested on synaesthetic colours (graphemes, ‘Syn’ classifiers),  
574 we observed higher performance in synaesthetes in the parietal cortex (Table S1: on the right side  
575 with paired t-tests and on the left side with two-sample t-tests; bilateral difference could be  
576 observed for both contrasts when using a higher cluster-forming threshold). However, testing  
577 synaesthetes against chance revealed no cluster at our threshold around these coordinates of the  
578 parietal cortex (performance was above chance in both groups in the occipital cortex, as expected).

579 We found no difference between controls and synaesthetes at our statistical threshold for the critical  
580 test of shared coding of real and synaesthetic colours, when classifiers were trained on coloured  
581 rings and tested on graphemes (‘C2S’ classifiers). Testing synaesthetes against chance also revealed  
582 no cluster. The reverse classification (learning on graphemes, ‘S2C’), however, revealed two clusters  
583 with higher performance in synaesthetes for independent t-tests, in the right occipito-temporal  
584 cortex and in the left putamen. Only the first cluster was confirmed by paired-comparisons. When  
585 testing performance against chance two clusters emerged for synaesthetes (none for controls), one  
586 again in the same part of the right occipito-temporal cortex, and the other in the left parietal cortex,  
587 abutting the parietal cluster obtained previously for the higher performance in synaesthetes for the  
588 ‘Syn’ classification (we shall come back to this concordance in the following *post-hoc* analysis).

589 Finally, for classifiers trained on either letters or digits (and tested respectively on either digits or  
590 letters), a critical test of the coding of synaesthetic colours, higher performance was observed, but in  
591 controls, in the left inferior frontal gyrus, for both paired and independent t-tests. However, no  
592 cluster emerged anywhere in the brain in controls (nor in synaesthetes) when testing performance  
593 against chance, so this cluster should be considered as a false positive.

594 *Post-hoc* analysis. We further explored the performance of classifiers in the two clusters identified by  
595 the 'Syn' classifier and the five clusters identified by the 'S2C' classifier, corresponding in fact to two  
596 parietal regions (left and right), one right occipito-temporal region and one cluster in the left  
597 putamen. In each cluster, we computed the average across voxels of the searchlight scores, in order  
598 to compare the performances of our five classifiers for synaesthetes and controls in these seven  
599 clusters defined *post-hoc*, with two-sample and paired-sample t-tests. We also compared the  
600 performance of each group against chance. Statistically "significant" differences were obtained only  
601 for the contrasts used to define the clusters (Table S1). Only one additional comparison was  
602 "significant" ( $p = 0.012$ , not corrected for multiple comparisons) in the left parietal cluster at XYZ = [-  
603 33 -28 50], which had been obtained when testing synaesthetes against chance for the 'S2C'  
604 classification (training classifiers on graphemes and testing them on colours: Figure 8): synaesthetes  
605 also performed better than controls at decoding graphemes ('Syn' classification), 95%CI = [1 9]%  
606 (paired comparisons), and better than chance (95% CI = [26 31]%), but the performance was not  
607 correlated with the strength of synaesthetic associations ( $p = 0.51$ ).

608

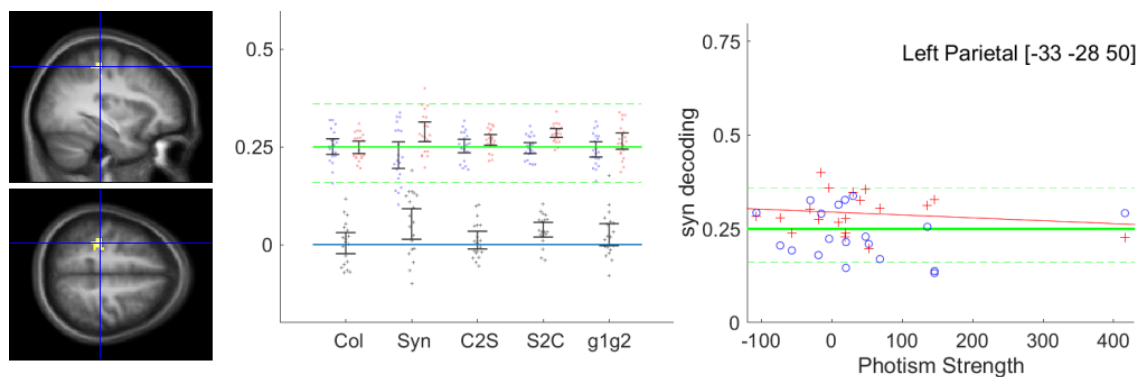

609

610 **Figure 8. Left:** Parietal cluster identified based on whole brain searchlight analysis for 'S2C' decoding, Synaesthetes>chance  
611 (27-voxel cluster at XYZ = [-33 -28 50], one-sample t-test). **Middle:** performance of classifiers in this cluster (same  
612 conventions as in Figure 5). The performance of synaesthetes was logically above chance for the 'S2C' classification, since  
613 the cluster was defined based on this contrast. For the independent classifier 'Syn', the performance of synaesthetes was  
614 also above chance and above that of controls. **Right:** Absence of correlation between the strength of synaesthetic  
615 associations and 'Syn' decoding (Spearman  $r = 0.02$ ,  $N = 19$ ,  $p = 0.95$ ; for 'S2C' decoding, not shown: Spearman  $r = -0.15$ ,  $N =$   
616  $19$ ,  $p = 0.53$ ).

## 617 **Whole brain univariate analyses (normalized anatomical space)**

618 Similarly to the searchlight analyses, these whole-brain univariate exploratory analyses were  
619 performed to discover clusters potentially involved in synaesthesia outside of our ROIs. They  
620 revealed no difference between controls and synaesthetes at our statistical threshold for T-contrasts  
621 of graphemes when performing two-sample t-tests. However, the paired-sample t-tests revealed  
622 stronger BOLD signal in a small cluster in synaesthetes, close to the left precentral gyrus. We treated  
623 this cluster as a candidate region for the coding of synaesthetic colours (Supporting Information,  
624 Table S1).

625 For F-contrasts, we did not observe any stronger modulation in synaesthetes (neither for two-sample  
626 nor paired-sample t-tests). Surprisingly, we observed stronger modulation in controls in two clusters  
627 (paired comparisons), in the right occipito-parietal cortex (Supporting Information, Figure S1) and in  
628 the left insula. The two-sample t-tests revealed only the occipito-parietal cluster. We did not have  
629 any explanation for these differences, which might be false-positives (Eklund et al., 2016). We note  
630 that the analysis by (Rouw & Scholte, 2010) revealed a cluster (which they called IPS, cluster extent =  
631 3280 mm<sup>3</sup>) at equivalent peak coordinates on the left side ([-30 -72 28]), obtained with the contrast  
632 synaesthetes>controls for (synaesthetic graphemes)>(non-synaesthetic graphemes). In our case, the  
633 weaker modulation by graphemes in synaesthetes would rather argue against the hypothesis of a  
634 functional role of this region in synaesthesia. We included these two regions in our post-hoc MVPA  
635 analyses for further exploration.

636 We also tested T- and F-contrasts for the responses to real colours (rings). We observed stronger  
637 BOLD signal (T-contrast) in synaesthetes only, in three clusters for paired comparisons (in the left  
638 posterior and anterior insula – see Supporting Information, Figure S2 - and in the left  
639 parahippocampal region) and two other clusters for two-sample t-tests (in the right middle temporal  
640 gyrus and in the right superior, medial, frontal gyrus - see Supporting Information, Figure S3). The  
641 lack of consistency between paired and two-sample t-tests could again suggest false-positives, but  
642 we nonetheless included these five clusters in our post-hoc MVPA analyses, in case those stronger  
643 activations be related to the implicit activation of graphemes by the colours associated to them (“bi-  
644 directional” synaesthesia: Gebuis, Nijboer, & Van der Smagt, 2009). F-contrasts to colours revealed  
645 only one cluster of stronger modulation in controls in the frontal region, but in the middle of white  
646 matter and thus clearly a false positive.

647 We compared the performances of synaesthetes and controls for our classifiers in those eight  
648 clusters defined post-hoc, with two-sample and paired-sample t-tests. Only three comparisons came

649 out “significant” at  $p < 0.05$ , but without correction for multiple comparisons (Table S1). Supporting  
650 Information, Figs. S1 to S3 detail the results obtained in these three post-hoc clusters.

651

## 652 **Discussion**

653 Our goal with this study was to provide univocal evidence of the activation of the ‘colour network’ by  
654 imaginary colours as experienced by grapheme colour synesthetes.

655 Studies based on univariate analyses to search the neural correlates of synaesthetic colours face two  
656 major problems. First, BOLD responses to stimuli leading to the experience of synaesthetic colours  
657 need to be compared to a control response (subtraction method: see the Figure 1 by Hupé & Dojat,  
658 2015). Such a control response may be obtained by testing the same subjects with similar stimuli that  
659 do not generate a synaesthetic experience (pseudo-graphemes or graphemes that, by chance, do not  
660 generate such an experience in the tested synaesthetes). The problem is, it is impossible to know  
661 whether the additional activations, if observed, are specific to the synaesthetic experience of colours.  
662 For example, letters and numbers can also be named, unlike pseudo-graphemes. A control response  
663 may also be obtained by testing non-synesthetes with the same stimuli. But, again, it is impossible to  
664 know whether the additional activations, if observed, are specific to the synaesthetic experience of  
665 colours. For example, synaesthetes often enjoy visualizing the synesthetic colours of graphemes:  
666 attentional and emotional components may therefore bias the comparison. Second, averaging the  
667 results across subjects require to transform the individual data within a common reference space,  
668 with the possible loss of fine-grained spatial information. The first problem may generate false  
669 positive results, the second false negative results.

670 Thus, because univariate analysis led to inconsistent results (Hupé & Dojat, 2015), we used in this  
671 study Multivariate Pattern Analysis (MVPA) on 20 synaesthetes and 20 control participants, to  
672 explore whether the neural processing of real colours and synaesthetic colours shared patterns of  
673 activations. To our knowledge, it was the first time that MVPA was proposed in this context. By using  
674 MVPA, we could in principle overcome problems associated with univariate analysis because we test  
675 the performance, in each individual, related to the coding of certain attributes, not a level of  
676 activation in need of further interpretation. Our design was optimized to test if classifiers, trained to  
677 distinguish patterns of responses to four different real colours in groups of voxels from different  
678 regions of the brain, could classify above chance the responses of those voxels to achromatic  
679 graphemes leading to the synaesthetic experience of the exact same colours. The logic was that only  
680 synaesthetes tested with their exact, idiosyncratic, synaesthetic code could produce above-chance  
681 performance. Unfortunately, the performance of our group of 20 synaesthetes remained very close



682 to chance (all  $p < 0.05$ , uncorrected) in all our selections of voxels (retinotopic areas defined at the  
683 individual level as well as the fusiform gyrus and parietal regions of interest defined based on a  
684 probabilistic atlas), and whatever the extent of the chosen areas or the selection method of the  
685 voxels (Figure 5 and 6, classification 'C2S' in synaesthetes shown by red points).

686 A statistical comparison revealed that the performance of synaesthetes was also no better on  
687 average than that obtained in control subjects. Of course, the absence of statistically significant  
688 effect cannot lead to conclude to the absence of effects. The null result could be due to a lack of  
689 power, if, for example, only a few synaesthetes had reached a good performance. However, the  
690 results were striking when inspecting the distributions of individual performances: the scores of most  
691 synaesthetes were distributed around the chance level, and almost no synaesthete reached an  
692 individual performance above the chance level (binomial probability: all the points are included  
693 within the green dotted lines). The correlation analyses with a measure of individual differences (the  
694 strength of the synaesthetic associations) further confirmed the homogenous performance of  
695 synaesthetes around chance. Under our experimental conditions, the collected data therefore do  
696 show quite convincingly the absence of shared coding of real and synaesthetic colours.

697 We further analysed our data set in different ways, in order to be able to detect some signs of coding  
698 of synaesthetic colours by neural networks not involved in the coding of real colours. The 'g1g2'  
699 classification, which could have been achieved only on the basis of shared synaesthetic colours  
700 across letters and digits, remained at the chance level in synaesthetes. The 'syn' classification,  
701 expected to reach a higher performance in synaesthetes, was similar in controls. We also explored  
702 the performance of classifiers beyond our regions of interest, across the whole (normalized) brain  
703 (searchlight analysis) without obtaining significant results.

704 We also explored the whole brain using mass univariate tests, knowing that whole brain analyses  
705 face the ill-posed problem of correction of multiple comparisons of partly correlated tests, problem  
706 not fully solved by the Random Field Theory (Eklund et al., 2016). Moreover, since we performed in  
707 total at least nine whole brain searchlight analyses and four whole brain univariate comparisons (T-  
708 and F-contrasts for responses to graphemes and colours, see Table S1), we could have set a family-  
709 wise error level at 0.05/13. We preferred to keep a non-corrected level for easier comparisons with  
710 other studies. The whole brain analyses were used only for exploration, and for every detected  
711 cluster we searched for additional evidence (differential response for other comparisons, or  
712 correlation with individual differences). Since we did not find any additional evidence, we conclude  
713 that these clusters may be false positives. We however mention them (see Table S1) in case  
714 additional evidence be found in other studies.

715 For now however, our results further suggest that 3T fMRI studies may not be able yet to identify the  
716 neural correlates of the synaesthetic experience of colour (Hupé & Dojat, 2015), probably because  
717 those are fine-grained distributed at a resolution lower than our 3-mm<sup>3</sup> voxel resolution, or because  
718 the nature of its coding does not translate (well) into BOLD responses. Surprisingly, though, if  
719 considering synaesthetic colours simply as a form of mental imagery, we were expecting above-  
720 chance decoding performance as observed for other tasks involving mental imagery. Those other  
721 tasks, however, typically involved different categories of objects, like food, tools, faces and buildings  
722 (Reddy et al., 2010) or objects, scenes, body parts and faces (Cichy, Heinzle, & Haynes, 2012), which  
723 evoked stronger BOLD signal in specific areas (like the Fusiform Face Area). Other studies involved  
724 retinotopic properties (Thirion et al., 2006) where, again, differences of BOLD signal can be easily  
725 observed. Here we were trying to decode mental images within only a single category, colour. This  
726 confirms that synaesthetic experiences do not evoke strong BOLD responses, at least when using  
727 standard 3T MR scanner, as already suggested by the inconsistency of the published results based on  
728 univariate models.

729 Below we consider alternative explanations (e.g., methodological flaws) to the absence in our data of  
730 neural traces of the processing of synaesthetic colours.

731 *Colour imagery could not be decoded.*

732 Our study used a protocol very similar to that used by (Bannert & Bartels, 2013), who could decode  
733 the typical colour from eight objects, presented as greyscale photos, with classifiers trained on  
734 concentric colour circles designed after (Brouwer & Heeger, 2009), like in our study. The prototypical  
735 colour of the objects was red, green, blue or yellow (like a banana and a tennis ball). Across 18  
736 subjects, decoding accuracy was “significantly” above chance in V1, but reached only 32% on  
737 average, which is hardly above the 95% CI ([24 30]%) of the performance observed for our similar  
738 classifier (‘C2S’) in the areas V1 to V4 of synaesthetes. Their experimental procedures, slightly  
739 different from ours, may have better optimized the signal to noise ratio and allowed this higher  
740 performance (see below). Alternatively, since the colour-diagnostic objects were presented before  
741 the coloured concentric rings, subjects may have imagined, when viewing the rings, the very objects  
742 that were presented before. Subjects had to do a motion discrimination task to divert their attention  
743 (similarly to our one-back task), but such a task (like ours) was not very demanding (though note that  
744 Bannert and Bartels argue that their results are due to automatically occurring processes during  
745 object vision rather than active imagery). Of course, a similar argument holds even more in our  
746 experiment: synaesthetes were very likely to recognize the colour matching exactly their  
747 synaesthetic colour of letters and digits, and they might well have imagined the letter or digit when

748 looking at the coloured stimuli. In both cases, decoding would be based on the complex shape of  
749 stimuli rather than their colour. In the case of Bannert and Bartels, objects were similar to those used  
750 in other successful visual-to-imagery decoding and involved several categories of objects as well as  
751 different retinotopic properties (the objects had different orientations but were rotating; however  
752 the banana or the coke can, for example, had about 12 deg extent, apparently much more than the  
753 Nivea tin or the blue traffic sign), while in our case objects all belonged to the grapheme category,  
754 and all spanned the same visual extent. It is therefore possible that in the study by Bannert and  
755 Bartels the slightly above chance decoding performance was due to residual category and retinotopic  
756 properties, not to colour. With such an interpretation, decoding of imaginary colours would have  
757 failed in both their and our study.

758 *Flaw in the paradigm used: duration of event presentation.*

759 Our close to chance performance could be linked to our choice of a fast event related paradigm, each  
760 stimulus being presented each time for only 1 s, with an ISI = 1 s +/- 333 ms. Bannert and Bartels  
761 presented images for 2 s with a 1 s ISI, each repeated four times in a row (miniblocks). One may  
762 wonder whether our presentation time was sufficient to trigger synaesthetic associations. However,  
763 psychophysical tasks show that the naming of the synaesthetic colours of graphemes takes on  
764 average much less than 1 s (Table 1). Because of our one-back attentional task, though, we cannot be  
765 sure that the synaesthetic associations were always conscious. However, synaesthetes did not report  
766 any specific difficulty with their synaesthetic experience when viewing, inside the scanner, the  
767 proposed paradigm. We designed such a protocol because we did not want synaesthetes to pay too  
768 much attention to their synaesthetic colours, then possibly triggering complex attentional and  
769 emotional processes. Those components are part of the synaesthetic experience, but they do not tell  
770 us anything about the phenomenological experience of colours, our main goal being to try to isolate  
771 the possible neural commonalities of the real and synaesthetic experience. The quasi-absence of  
772 observed differences of overall activation and modulation between synaesthetes and controls for  
773 graphemes indicates that we were successful in synaesthetes having a similar experience to controls  
774 for graphemes, in terms of attentional and emotional content. With different conditions, favouring  
775 synaesthetic colours to be experienced intensely, we would expect the overall pattern of brain  
776 activity to be different, but those differences would be poorly informative.

777 *Flaw in the paradigm used: type of stimuli.*

778 A critical aspect of our fast-event paradigm is related to the slow dynamics of the hemodynamic  
779 signal and the signal to noise we could obtain. Here, the critical benchmark was the possibility to  
780 decode real colours, since the protocol was identical for synaesthetic and real colours. We were

781 successful in decoding colours above chance in the visual cortex, but not to the extent that we  
782 hoped: only 35% on average, chance being 25%. Using 12 s miniblocks, Bannert and Bartels obtained  
783 an average performance for colours between 35% and 40% in V1 to V4. Differences other than the  
784 timing of the stimuli may explain this only slightly higher performance: their total presentation time  
785 of coloured stimuli was about 42 min (20 min in our study; for example, Brouwer & Heeger, 2009,  
786 obtained even higher performances with experienced participants tested for much longer durations);  
787 their stimuli were much larger (7.19 deg vs. 2 deg radius) and isoluminant (we do not know whether  
788 luminance information in our case helped or hindered decoding). Because they were constrained by  
789 the idiosyncratic synaesthetic associations, our stimuli were also not well distributed within the  
790 colour space (see Figure 2). Colour differences between categories (R, G, B and Y) and similarity  
791 between colours for pairs (letter-digit) were different between subjects and not always optimal to  
792 reach maximal performance by classifiers. Probably, some pairs of supposedly similar colours  
793 confused classifiers, as well as short distances between some categories. Retrospectively, we should  
794 in fact even consider ourselves lucky to have achieved such a performance for colour decoding.  
795 Choosing only three colours would have allowed us to avoid confusions and get more exemplars for  
796 each colour (with fewer categories to decode, though, confounding factors are more likely). More  
797 repetitions would be welcome, however we wanted to record signals for real and synaesthetic  
798 colours within the same scanning session to avoid any spatial smoothing of the voxels (which is often  
799 necessary when aligning images obtained in different sessions). Preliminary experiments had showed  
800 us indeed that combining the signals from different sessions did not improve performance (Ruiz et  
801 al., 2012). Our total session time was about 1 hour, which is about the limit one may ask naive  
802 subjects to lie in a scanner without moving while maintaining fixation and attention over boring  
803 stimuli.

#### 804 *Lack of statistical power to detect small differences.*

805 Given our moderate performance for colour classification, our absence of above-chance performance  
806 for the decoding of synaesthetic colours might be due to a lack of power, since performance across  
807 real and imaginary images is typically lower than for real images (Reddy et al., 2010; Bannert &  
808 Bartels, 2013). Indeed, if real differences exist between synaesthetes and controls in the measured  
809 BOLD signal, these differences are too small to be detected reliably with sample sizes similar to ours,  
810 with no indication about the minimum required sample size. Such a reasoning holds for the average  
811 performance, but some subjects did reach performance for colour decoding well above 50%. Yet, the  
812 distribution of individual scores were all very similar for controls and synaesthetes (see Figs. 5-6).  
813 There was some correlation between the performances of colour ('Col') and synaesthetic ('Syn')  
814 classifiers in retinotopic areas (especially V1), but it was similar in synaesthetes and controls (the

815 differences between synaesthetes and controls for the ‘Syn’ classifier were in fact even weaker when  
816 including the ‘Col’ performance as a covariate).

817 For the statistical analysis, we adopted the “new statistical approach” proposed by (Cumming, 2012)  
818 and focussed on confidence intervals of effect sizes instead of the less informative thresholded p-  
819 value maps (Hupé, 2015). In order to facilitate the comparison of our study with previous studies, we  
820 indicated when the comparisons could be considered as “significant” (a 95% CI not crossing the  
821 chance level corresponds to  $p < 0.05$ ) when correcting the risk level for multiple comparisons. Note  
822 however that correction for multiple comparisons corresponds to an ill-posed problem, because  
823 there is no unique and objective way to define the family of tests (Hupé, 2015). Such a problem is  
824 pretty obvious in our case, where the number of considered ROIs depends on our choice of  
825 regrouping or not ROIs, and by how much. We applied a Bonferroni correction over twelve ROIs, but  
826 we could have considered the family across the five types of classifiers (so at least 60 tests).  
827 However, by focusing on the extent of the CIs, the conclusions do not change much for different  
828 levels of CI (the extent of a 99.58% CIs is just a bit larger than for a 95% CI): for all the cases that may  
829 suggest differences between groups, the true differences compatible with our observations may be  
830 either close to absent (difference close to or including 0, or odds ratio close to or including 1) or at  
831 most up to about 15% (or odds ratio = 1.5), a value that one may consider meaningful. As in most  
832 studies currently published in cognitive neuroscience dealing with small effects, the width of our  
833 confidence intervals is too wide to reach any definitive conclusion on the sole basis of one test (lack  
834 of power). Our choice of CI presentation, however, brings useful information allowing cumulative  
835 science (Yarkoni, Poldrack, Van Essen, & Wager, 2010) and shows that if any real difference exists, it  
836 is probably not very large because corresponding to less than a 15% difference of performance.

837

## 838 **Conclusion**

839 Identifying the neural correlates of the synaesthetic experience of colours may still be beyond the  
840 reach of present technology, including hardware (3T MR scanner) and advanced data analysis  
841 techniques such as MVPA, and that we still do not find any evidence of common neural coding of real  
842 and synaesthetic colours (Hupé et al., 2012b). However, across all our analyses, we did find several  
843 “significant” differences for several comparisons, which we listed in the Results section and detailed  
844 in Supporting Information, Table S1. Other studies also did report so-called “significant” effects, even  
845 though the methods to determine the significance levels were questionable in most studies (Hupé &  
846 Dojat, 2015). We applied the latest recommendations for group-level cluster-wise inferences (9-  
847 mm FWHM spatial smoothing, cluster-defining threshold = 0.001, cluster-based  $pFWE < 0.05$ ,

848 groups of 20 participants), yet these criteria do not protect well against false positives (Eklund et al.,  
849 2016). In our study, for each “significant” effect, we had a set of independent measures to further  
850 explore any difference that may be real: the performance of other classifiers as well as individual  
851 differences (the strength of the synaesthetic associations measured in Stoop-like psychophysics  
852 tests). We never found any coherence across different measures. Moreover, the locations of the  
853 “significant” effects appeared quite randomly across the brain. As long as no other study replicates  
854 any of these “differences”, we should keep in mind that they could be false positives. Our study thus  
855 further shows that common statistical practices based on Null Hypothesis Significance Tests (NHST)  
856 are not adequate for scientific inference (Hupé & Dojat, 2015; Wasserstein & Lazar, 2016; Hupé,  
857 2017). By stressing that we did not find any evidence of common neural coding of real and  
858 synaesthetic colours, based on our data as well as past studies, we do not conclude that such a  
859 neural coding does not exist. We bring to light what is required to have any chance to reveal the  
860 neural bases of the synaesthetic experience using MRI, like more data by subject, higher signal to  
861 noise ratio and spatial resolution (e.g., 7 Tesla scanner: Turner, 2016) and maybe larger cohorts. In  
862 order to start contributing to this last aim, via the constitution of dedicated data repositories and  
863 meta-analyses, our data are freely available on request (<https://shanoir.irisa.fr/Shanoir/login.seam>,  
864 contact M. Dojat). Please refer to the present paper in case of the reuse of these datasets.

865

## 866 References

- 867 Bannert, M. M., & Bartels, A. (2013). Decoding the yellow of a gray banana. *Curr. Biol.*, *23*(22), 2268-  
868 2272. doi: 10.1016/j.cub.2013.09.016
- 869 Bates, D., Mächler, M., Bolker, B., & Walker, S. (2015). Fitting linear mixed-effects models using lme4.  
870 *J. Stat. Soft.*, *67*(1), 48. doi: 10.18637/jss.v067.i01
- 871 Bordier, C., Hupé, J. M., & Dojat, M. (2015). Quantitative evaluation of fMRI retinotopic maps, from  
872 V1 to V4, for cognitive experiments. *Front. Hum. Neurosci.*, *9*, 277. doi:  
873 10.3389/fnhum.2015.00277
- 874 Brouwer, G. J., & Heeger, D. J. (2009). Decoding and reconstructing color from responses in human  
875 visual cortex. *J. Neurosci.*, *29*(44), 13992-14003. doi: 10.1523/JNEUROSCI.3577-09.2009
- 876 Caspers, J., Zilles, K., Eickhoff, S. B., Schleicher, A., Mohlberg, H., & Amunts, K. (2013).  
877 Cytoarchitectonical analysis and probabilistic mapping of two extrastriate areas of the human  
878 posterior fusiform gyrus. *Brain Struct. Funct.*, *218*(2), 511-526. doi: 10.1007/s00429-012-  
879 0411-8
- 880 Caspers, S., Eickhoff, S. B., Geyer, S., Scheperjans, F., Mohlberg, H., Zilles, K., & Amunts, K. (2008). The  
881 human inferior parietal lobule in stereotaxic space. *Brain Struct. Funct.*, *212*(6), 481-495. doi:  
882 10.1007/s00429-008-0195-z
- 883 Caspers, S., Geyer, S., Schleicher, A., Mohlberg, H., Amunts, K., & Zilles, K. (2006). The human inferior  
884 parietal cortex: cytoarchitectonic parcellation and interindividual variability. *NeuroImage*,  
885 *33*(2), 430-448. doi: 10.1016/j.neuroimage.2006.06.054
- 886 Chiou, R., & Rich, A. N. (2014). The role of conceptual knowledge in understanding synaesthesia:  
887 Evaluating contemporary findings from a 'hub-and-spoke' perspective. *Front. Psychol.*, *5*. doi:  
888 10.3389/fpsyg.2014.00105
- 889 Choi, H. J., Zilles, K., Mohlberg, H., Schleicher, A., Fink, G. R., Armstrong, E., & Amunts, K. (2006).  
890 Cytoarchitectonic identification and probabilistic mapping of two distinct areas within the  
891 anterior ventral bank of the human intraparietal sulcus. *J. Comp. Neurol.*, *495*(1), 53-69. doi:  
892 10.1002/cne.20849
- 893 Chun, C. A., & Hupé, J. M. (2013). Mirror-touch and ticker tape experiences in synesthesia. *Front.*  
894 *Psychol.*, *4*, 776. doi: 10.3389/fpsyg.2013.00776
- 895 Chun, C. A., & Hupé, J. M. (2016). Are synesthetes exceptional beyond their synesthetic associations?  
896 A systematic comparison of creativity, personality, cognition, and mental imagery in  
897 synesthetes and controls. *Brit. J. Psychol.*, *107*, 397-418. doi: 10.1111/bjop.12146
- 898 Cichy, R. M., Heinzle, J., & Haynes, J. D. (2012). Imagery and perception share cortical representations  
899 of content and location. *Cereb. Cortex*, *22*(2), 372-380. doi: 10.1093/cercor/bhr106
- 900 Cox, D. D., & Savoy, R. L. (2003). Functional magnetic resonance imaging (fMRI) "brain reading":  
901 detecting and classifying distributed patterns of fMRI activity in human visual cortex.  
902 *NeuroImage*, *19*(2 Pt 1), 261-270.
- 903 Cumming, G. (2012). *Understanding The New Statistics: Effect Sizes, Confidence Intervals, and Meta-*  
904 *Analysis*. New York: Routledge.
- 905 Dehaene, S., & Cohen, L. (2011). The unique role of the visual word form area in reading. *Trends*  
906 *Cogn. Sci.*, *15*(6), 254-262. doi: 10.1016/j.tics.2011.04.003
- 907 Dojat, M., Pizzagalli, F., & Hupé, J. M. (2018). Magnetic resonance imaging does not reveal structural  
908 alterations in the brain of grapheme-color synesthetes. *PLoS ONE*, *13*(4), e0194422. doi:  
909 10.1371/journal.pone.0194422
- 910 Eagleman, D. M., Kagan, A. D., Nelson, S. S., Sagaram, D., & Sarma, A. K. (2007). A standardized test  
911 battery for the study of synesthesia. *J. Neurosci. Methods*, *159*(1), 139-145. doi:  
912 10.1016/j.jneumeth.2006.07.012
- 913 Edquist, J., Rich, A. N., Brinkman, C., & Mattingley, J. B. (2006). Do synaesthetic colours act as unique  
914 features in visual search? *Cortex*, *42*(2), 222-231.

- 915 Eickhoff, S. B., Paus, T., Caspers, S., Grosbras, M. H., Evans, A. C., Zilles, K., & Amunts, K. (2007).  
916 Assignment of functional activations to probabilistic cytoarchitectonic areas revisited.  
917 *NeuroImage*, 36(3), 511-521. doi: 10.1016/j.neuroimage.2007.03.060
- 918 Eklund, A., Nichols, T. E., & Knutsson, H. (2016). Cluster failure: Why fMRI inferences for spatial  
919 extent have inflated false-positive rates. *Proc. Natl. Acad. Sci. USA*, 113(28), 7900-7905. doi:  
920 10.1073/pnas.1602413113
- 921 Flournoy, T. (1893). *Des Phénomènes de Synopsis (Audition Colorée): Photismes, Schèmes Visuels,*  
922 *Personnifications*. Paris: Alcan.
- 923 Formisano, E., & Kriegeskorte, N. (2012). Seeing patterns through the hemodynamic veil--the future  
924 of pattern-information fMRI. *NeuroImage*, 62(2), 1249-1256. doi:  
925 10.1016/j.neuroimage.2012.02.078
- 926 Galton, F. (1880). Statistics of mental imagery. *Mind*, 5, 301-318.
- 927 Gebuis, T., Nijboer, T. C., & Van der Smagt, M. J. (2009). Multiple dimensions in bi-directional  
928 synesthesia. *Eur. J. Neurosci.*, 29(8), 1703-1710. doi: 10.1111/j.1460-9568.2009.06699.x.
- 929 Grill-Spector, K., Kourtzi, Z., & Kanwisher, N. (2001). The lateral occipital complex and its role in  
930 object recognition. *Vision Res.*, 41(10-11), 1409-1422. doi: 10.1016/S0042-6989(01)00073-6
- 931 Hebart, M. N., & Baker, C. I. (2017). Deconstructing multivariate decoding for the study of brain  
932 function. *NeuroImage*. doi: 10.1016/j.neuroimage.2017.08.005
- 933 Hupé, J. M. (2015). Statistical inferences under the Null hypothesis: Common mistakes and pitfalls in  
934 neuroimaging studies. *Front. Neurosci.*, 9, 18. doi: 10.3389/fnins.2015.00018
- 935 Hupé, J. M. (2017). Comment on “Ducklings imprint on the relational concept of ‘same or different’”.  
936 *Science*, 355(6327), 806-806. doi: 10.1126/science.aah6047
- 937 Hupé, J. M., Bordier, C., & Dojat, M. (2012a). A BOLD signature of eyeblinks in the visual cortex.  
938 *NeuroImage*, 61, 149–161. doi: 10.1016/j.neuroimage.2012.03.001
- 939 Hupé, J. M., Bordier, C., & Dojat, M. (2012b). The neural bases of grapheme-color synesthesia are not  
940 localized in real color sensitive areas. *Cereb. Cortex*, 22, 1622:1633. doi:  
941 10.1093/cercor/bhr236
- 942 Hupé, J. M., & Dojat, M. (2015). A critical review of the neuroimaging literature on synesthesia. *Front.*  
943 *Hum. Neurosci.*, 9, 103. doi: 10.3389/fnhum.2015.00103
- 944 Janik McErlean, A. B., & Banissy, M. J. (2017). Color processing in synesthesia: what synesthesia can  
945 and cannot tell us about mechanisms of color processing. *Top. Cogn. Sci.*, 9(1), 215-227. doi:  
946 10.1111/tops.12237
- 947 Kriegeskorte, N., Goebel, R., & Bandettini, P. (2006). Information-based functional brain mapping.  
948 *Proc. Natl. Acad. Sci. USA*, 103(10), 3863-3868. doi: 10.1073/pnas.0600244103
- 949 Lorenz, S., Weiner, K. S., Caspers, J., Mohlberg, H., Schleicher, A., Bludau, S., . . . Amunts, K. (2017).  
950 Two new cytoarchitectonic areas on the human mid-fusiform gyrus. *Cereb. Cortex*, 27(1),  
951 373-385. doi: 10.1093/cercor/bhv225
- 952 Mumford, J. A., Turner, B. O., Ashby, F. G., & Poldrack, R. A. (2012). Deconvolving BOLD activation in  
953 event-related designs for multivoxel pattern classification analyses. *NeuroImage*, 59(3),  
954 2636-2643. doi: 10.1016/j.neuroimage.2011.08.076
- 955 Norman, K. A., Polyn, S. M., Detre, G. J., & Haxby, J. V. (2006). Beyond mind-reading: multi-voxel  
956 pattern analysis of fMRI data. *Trends Cogn. Sci.*, 10(9), 424-430. doi:  
957 10.1016/j.tics.2006.07.005
- 958 Parkes, L. M., Marsman, J. B., Oxley, D. C., Goulermas, J. Y., & Wuerger, S. M. (2009). Multivoxel fMRI  
959 analysis of color tuning in human primary visual cortex. *J. Vis.*, 9(1), 1 1-13. doi: 10.1167/9.1.1
- 960 Pedregosa, F., Varoquaux, G., Gramfort, A., Michel, V., Thirion, B., Grisel, O., . . . Duchesnay, E.  
961 (2011). Scikit-learn: Machine Learning in Python. *J. Mach. Learn. Res.*, 12, 2825-2830.
- 962 Poldrack, R. A. (2007). Region of interest analysis for fMRI. *Soc. Cogn. Affect. Neurosci.*, 2(1), 67-70.  
963 doi: 10.1093/scan/nsm006
- 964 Reddy, L., Tsuchiya, N., & Serre, T. (2010). Reading the mind's eye: decoding category information  
965 during mental imagery. *NeuroImage*, 50(2), 818-825. doi: 10.1016/j.neuroimage.2009.11.084



- 966 Reeder, R. R. (2016). Individual differences shape the content of visual representations. *Vision Res.*  
967 doi: 10.1016/j.visres.2016.08.008
- 968 Rouw, R., & Scholte, H. S. (2010). Neural basis of individual differences in synesthetic experiences. *J.*  
969 *Neurosci.*, 30(18), 6205-6213. doi: 10.1523/JNEUROSCI.3444-09.2010
- 970 Rouw, R., & Scholte, H. S. (2016). Personality and cognitive profiles of a general synesthetic trait.  
971 *Neuropsychologia*, 88, 35-48. doi: 10.1016/j.neuropsychologia.2016.01.006
- 972 Ruiz, M. J., & Hupé, J. M. (2015). Assessment of the hemispheric lateralization of grapheme-color  
973 synesthesia with Stroop-type tests. *PLoS ONE*, 10(3), e0119377. doi:  
974 10.1371/journal.pone.0119377
- 975 Ruiz, M. J., Hupé, J. M., & Dojat, M. (2012). *Use of pattern-information analysis in vision science: a*  
976 *pragmatic examination*. Paper presented at the MLMI, Nice.
- 977 Scheperjans, F., Hermann, K., Eickhoff, S. B., Amunts, K., Schleicher, A., & Zilles, K. (2008). Observer-  
978 independent cytoarchitectonic mapping of the human superior parietal cortex. *Cereb. Cortex*,  
979 18(4), 846-867. doi: 10.1093/cercor/bhm116
- 980 Simner, J., & Carmichael, D. A. (2015). Is synaesthesia a dominantly female trait? *Cogn. Neurosci.*,  
981 6(2-3), 68-76. doi: 10.1080/17588928.2015.1019441
- 982 Simner, J., Mulvenna, C., Sagiv, N., Tsakanikos, E., Witherby, S. A., Fraser, C., . . . Ward, J. (2006).  
983 Synaesthesia: The prevalence of atypical cross-modal experiences. *Perception*, 35(8), 1024-  
984 1033. doi: 10.1068/p5469
- 985 Stelzer, J., Lohmann, G., Mueller, K., Buschmann, T., & Turner, R. (2014). Deficient approaches to  
986 human neuroimaging. *Front. Hum. Neurosci.*, 8(462). doi: 10.3389/fnhum.2014.00462
- 987 Thirion, B., Duchesnay, E., Hubbard, E., Dubois, J., Poline, J. B., Lebihan, D., & Dehaene, S. (2006).  
988 Inverse retinotopy: inferring the visual content of images from brain activation patterns.  
989 *NeuroImage*, 33(4), 1104-1116. doi: 10.1016/j.neuroimage.2006.06.062
- 990 Tootell, R. B. H., & Nasr, S. (2017). Columnar segregation of magnocellular and parvocellular streams  
991 in human extrastriate cortex. *J. Neurosci.*, 37(33), 8014-8032. doi: 10.1523/jneurosci.0690-  
992 17.2017
- 993 Turner, R. (2016). Uses, misuses, new uses and fundamental limitations of magnetic resonance  
994 imaging in cognitive science. *Philos. Trans. R. Soc. Lond. B. Biol. Sci.*, 371(1705). doi:  
995 10.1098/rstb.2015.0349
- 996 Vasseur, F., Delon-Martin, C., Bordier, C., Warnking, J., Lamalle, L., Segebarth, C., & Dojat, M. (2010).  
997 fMRI retinotopic mapping at 3 T: Benefits gained from correcting the spatial distortions due  
998 to static field inhomogeneity. *J. Vis.*, 10(12), 30. doi: 10.1167/10.12.30
- 999 Ward, J. (2013). Synesthesia. *Annual Reviews in Psychology*, 64, 49-75. doi: 10.1146/annurev-psych-  
1000 113011-143840
- 1001 Wasserstein, R. L., & Lazar, N. A. (2016). The ASA's Statement on p-Values: Context, Process, and  
1002 Purpose. *The American Statistician*, 70(2), 129-133. doi: 10.1080/00031305.2016.1154108
- 1003 Watson, M. R., Chromy, J., Crawford, L., Eagleman, D. M., Enns, J. T., & Akins, K. A. (2017). The  
1004 prevalence of synaesthesia depends on early language learning. *Conscious Cogn.*, 48, 212-  
1005 231. doi: 10.1016/j.concog.2016.12.004
- 1006 Witthoft, N., & Winawer, J. (2013). Learning, memory, and synesthesia. *Psychol. Sci.*, 24(3), 258-265.  
1007 doi: 10.1177/0956797612452573
- 1008 Yarkoni, T., Poldrack, R. A., Van Essen, D. C., & Wager, T. D. (2010). Cognitive neuroscience 2.0:  
1009 building a cumulative science of human brain function. *Trends Cogn. Sci.*, 14(11), 489-496.  
1010 doi: 10.1016/j.tics.2010.08.004

1011

1012

1013 **Appendix**

1014 **Supporting Information** is available. It contains:

1015 Table S1. Clusters identified based on whole brain analyses and tested *post-hoc* with MVPA.

1016 Figure S1. Right occipito-parietal cortex cluster identified based on whole brain univariate analysis

1017 Figure S2. Left anterior insula cluster identified based on whole brain univariate analysis

1018 Figure S3. Right frontal cortex cluster identified based on whole brain univariate analysis

1019 Figure S4. Alternative version of Figure 5, based on mixed-effect generalized linear models

1020 Figure S5. Alternative version of Figure 6, based on mixed-effect generalized linear models

1021

1022

1023 **Author Contributions**

1024 M.J.R., M.D, and J.-M.H. designed research; M.J.R. and M.D. performed research; M.J.R., M.D, and J.-

1025 M.H. analysed data; J.-M.H. wrote the paper; M.J.R., M.D, and J.-M.H. revised the paper.

1026

1027 **Competing Interests**

1028 The authors declare no competing interests, financial or non-financial.
